1 **Subthreshold serotonin signals combined by the G proteins  $G\alpha_q$  and  $G\alpha_s$  activate the *C.***  
2 ***elegans* egg-laying muscles**

3  
4  
5  
6  
7

8 Andrew C. Olson, Allison M. Butt, Nakeirah T.M. Christie, Ashish Shelar, Michael R. Koelle

9 Department of Molecular Biophysics and Biochemistry, Yale University, New Haven, CT 06510

10 USA

11 Correspondence: [michael.koelle@yale.edu](mailto:michael.koelle@yale.edu)

12

13 **Abstract**

14 Individual neuron or muscle cells express many G protein coupled receptors (GPCRs) for  
15 neurotransmitters and neuropeptides. It remains unclear how these cells integrate multiple GPCR  
16 signals that all must act through the same few G proteins. We investigated how two serotonin  
17 GPCRs,  $G\alpha_q$ -coupled SER-1 and  $G\alpha_s$ -coupled SER-7, function together on the *C. elegans* egg-  
18 laying muscles to promote contraction and thus cause eggs to be laid. Using receptor null mutations  
19 and cell-specific knockdowns, we found that serotonin signaling through either SER-1/ $G\alpha_q$  or  
20 SER-7/ $G\alpha_s$  alone does not induce egg laying, but these subthreshold signals can combine to  
21 promote egg laying. However, using designer receptors or optogenetics to artificially induce high  
22 levels of either  $G\alpha_q$  signaling or  $G\alpha_s$  signaling in the muscles was sufficient to induce egg laying.  
23 Conversely, knocking down both  $G\alpha_q$  and  $G\alpha_s$  in the egg-laying muscle cells induced egg-laying  
24 defects stronger than those of a *ser-7 ser-1* double knockout. These results suggest that, in the egg-  
25 laying muscles, multiple GPCRs for serotonin and other signals each produce weak effects that  
26 individually do not result in strong behavioral outcomes. However, they can combine to produce  
27 sufficient levels of  $G\alpha_q$  and  $G\alpha_s$  signaling to promote muscle activity and egg laying.

28

## 29 **Introduction**

30 Individual neuron or muscle cells can express many different G protein coupled receptors  
31 (GPCRs), which in turn act through just three main types of heterotrimeric G proteins:  $G_s$ ,  $G_{q/11}$ ,  
32 and  $G_{i/o}$  (Kaur et al., 2017; Smith et al., 2019; Jiang et al., 2022). Evidently, many different  
33 chemical signals impinge on an individual cell within the body, and signaling through multiple  
34 GPCRs integrates this complex information to produce appropriate responses. How this occurs  
35 remains largely unclear and is the focus of this study.

36 Evidence for the widespread use of multiple GPCRs on individual cells to integrate  
37 chemical signals comes from studies across different cell types and organisms. Single-cell  
38 transcriptomics on primary cultures of mouse smooth muscle cells and endothelial cells indicate  
39 that individual cells express ~20 GPCRs on average (Kaur et al., 2017). Even when only 29 out of  
40 the >100 neuropeptide receptor genes are analyzed, a typical neuron expresses multiple such  
41 receptors (Smith et al., 2019). Vertebrate mast cells use at least 16 different GPCRs to respond to  
42 various neurotransmitters and neuropeptides (Xu et al., 2020).

43 Neural circuits of invertebrates that consist of only a small number of cells provide model  
44 systems in which it is possible to tease out how multiple GPCRs function together on individual  
45 cells. For example, in the crustacean somatogastric circuit, indirect evidence suggests a large  
46 number of different neurotransmitters and neuropeptides modulate activity of individual neurons  
47 (Marder and Bucher, 2007). In this study, we focus on the *C. elegans* egg-laying circuit, where we  
48 recently found that individual neuron and muscle cells each express multiple neurotransmitter  
49 GPCRs (Fernandez et al., 2020). A pair of neurons in this circuit release serotonin to activate egg  
50 laying, and there are multiple different serotonin GPCRs co-expressed on individual cells in the

51 circuit. Thus, serotonin signaling in the *C. elegans* egg-laying circuit provides an opportunity to  
52 analyze how different GPCRs on the same cells function together.

53         There are multiple serotonin GPCRs in both humans and *C. elegans*, and these are often  
54 co-expressed on the same target cells (Feng et al., 2001; Bonn et al., 2013). Humans have six  
55 families of serotonin GPCRs comprising at least 12 receptor subtypes (Sarkar et al., 2021).  
56 Pyramidal neurons, for example, can express up to five different subtypes of serotonin receptors,  
57 including two different  $G\alpha_q$ -coupled 5HT<sub>2</sub> receptor subtypes and the  $G\alpha_s$ -coupled 5HT<sub>4</sub> receptor  
58 (Feng et al., 2001). Signaling through each of these  $G\alpha_s$ - and  $G\alpha_q$ -coupled serotonin receptors can  
59 increase the excitability of target neurons (Rasmussen and Aghajanian, 1990; Lopez et al., 2021),  
60 but the logic of using multiple serotonin receptors in parallel on the same target cells remains  
61 unclear.

62         In the *C. elegans* egg-laying circuit, schematized in Figure 1A, the hermaphrodite specific  
63 neurons (HSNs) and ventral type C (VC) motor neurons synapse onto the egg-laying muscles. The  
64 HSNs release both serotonin and a neuropeptide named NLP-3 to induce activity of the VCs and  
65 contraction of the egg-laying muscles, resulting in egg laying (Collins and Koelle, 2013; Brewer  
66 et al., 2019). There are 16 egg-laying muscle cells in total, four each of four types: the um1 and  
67 um2 uterine muscle cell types, as well as vm1 and vm2 vulval muscle cell types. The um1, um2,  
68 and vm2 muscle cells each co-express the two serotonin receptors, SER-1 and SER-7, that are  
69 principally responsible for inducing egg laying (Fernandez et al., 2020). SER-1 is a  $G\alpha_q$ -coupled  
70 receptor, while SER-7 couples to  $G\alpha_s$  (Hamdan et al., 1999; Hobson et al., 2003; Carnell et al.,  
71 2005; Dempsey et al., 2005; Carre-Pierrat et al., 2006; Hobson et al., 2006). The vm1 muscle cells  
72 as well as the VC4 and VC5 neurons each express SER-7 but not SER-1 (Fernandez et al., 2020).

73           In this study, we have analyzed how SER-1/G $\alpha_q$  signaling and SER-7/G $\alpha_s$  signaling act  
74 together in the egg-laying circuit to result in egg laying.

75

## 76 **Results**

### 77 **Both the SER-1 and SER-7 serotonin receptors are required for exogenous and endogenous** 78 **serotonin to stimulate egg laying**

79           Application of exogenous serotonin causes wild-type worms to quickly initiate egg laying  
80 (Figure 1B and D). We reproduced previous studies (Carnell et al., 2005; Dempsey et al., 2005;  
81 Hobson et al., 2006) showing that SER-1 and SER-7 are each required for such serotonin-induced  
82 egg laying (Figure 1B-D). Animals carrying null alleles of the *ser-1* (Figure 1D) or *ser-7* (Figure  
83 1C and D) genes each showed severely reduced egg laying in response to exogenous serotonin.  
84 While one might have expected these co-expressed receptors to function redundantly, resulting in  
85 weak defects when knocking out one or the other, the surprisingly strong defects seen in the single  
86 receptor mutants prompted us to analyze in depth how SER-1 and SER-7 function together.

87           A third serotonin receptor, SER-5, has been reported to weakly promote serotonin-induced  
88 egg laying in certain genetic backgrounds (Hapiak et al., 2009). Because this effect is so weak  
89 (Figure 1-figure supplement 1) and SER-5 expression in the egg-laying system is reported as either  
90 weak and variable (Hapiak et al., 2009) or undetectable (Fernandez et al., 2020), this study  
91 excludes SER-5 from further analysis.

92           To reveal how SER-1 and SER-7 receptors mediate the ability of endogenously-released  
93 serotonin to induce egg laying, we measured the accumulation of unlaidd eggs in *ser-1* and *ser-7*  
94 null mutant animals. Because *C. elegans* continues to produce eggs even when it cannot lay them,  
95 the accumulation of unlaidd eggs serves as a convenient measure of defects in egg-laying behavior

96 (Chase and Koelle, 2004). Endogenous serotonin is co-released from the HSN neurons with NLP-  
97 3 neuropeptides, and these two signals act semi-redundantly to stimulate egg laying (Brewer et al.,  
98 2019). Therefore, the functional role of serotonin in the egg-laying system is best revealed in an  
99 *nlp-3* null mutant background: with NLP-3 removed, endogenous serotonin is the strongest  
100 remaining signal that stimulates egg laying, and mutations that perturb serotonin signaling thus  
101 show much stronger effects on egg laying. This effect is seen in the egg accumulation assays shown  
102 in Figure 1E-K and Figure 1-figure supplement 2. Knocking out *tph-1*, the tryptophan hydroxylase  
103 enzyme responsible for synthesizing endogenous serotonin (Sze et al., 2000), or knocking out *ser-*  
104 *1* or *ser-7* individually or together, caused only moderate egg-laying defects as seen by  
105 accumulation of ~20-30 unlaidd eggs (Figure 1E-H and Figure 1-figure supplement 2A and C).  
106 Knocking out *nlp-3* alone, like knocking out serotonin signaling alone, also caused only a modest  
107 egg-laying defect in which animals retained ~23 unlaidd eggs (Figure 1E and I, and Figure 1-figure  
108 supplement 2A). However, in a *tph-1; nlp-3* double mutant, the worms developed a far more severe  
109 egg-laying defect and became bloated with  $54.4 \pm 2.4$  unlaidd eggs (Figure 1E and Figure 1-figure  
110 supplement 2B).

111 The above-described results allow us to interpret measurements of animals carrying null  
112 mutations for *ser-1* and/or *ser-7* in the *nlp-3* null mutant background. Such animals showed egg-  
113 laying defects almost as strong as the defects of the *tph-1; nlp-3* double mutant that completely  
114 lacks both serotonin and NLP-3 (Figure 1E, J, and K and Figure 1-figure supplement 2). In the  
115 wild type or *nlp-3* null mutant backgrounds, knocking out both SER-1 and SER-7 resulted in a  
116 defect not much more severe than knocking out either serotonin receptor alone.

117 Taken together these data indicate that serotonin signals through the  $G\alpha_q$ -coupled SER-1  
118 and  $G\alpha_s$ -coupled SER-7 receptors to initiate egg laying in *C. elegans*. Although these receptors are

119 co-expressed on most muscle cells in the egg-laying system, surprisingly, loss of either the SER-  
120 1 or SER-7 receptor resulted in what appeared to be an almost complete loss of the ability of  
121 exogenous serotonin to stimulate egg laying and severely disrupted egg laying in response to  
122 endogenous serotonin.

123

124 **The SER-1 and SER-7 serotonin receptors are each required for endogenous serotonin to**  
125 **coordinate calcium transients in the vm1 and vm2 vulval muscles**

126 We next sought to determine how serotonin signaling through SER-1 and SER-7 induces  
127 egg laying in *C. elegans*. We had previously observed that serotonin acts with the neuropeptide  
128 NLP-3 to result in simultaneous calcium transients in the vm1 and vm2 vulval muscles. Egg laying  
129 only occurs during such simultaneous vm1 and vm2 calcium transients, which drive coordinated  
130 contraction of these vulval muscle cells to release eggs (Brewer et al., 2019). We hypothesized  
131 that SER-1 and SER-7 are the receptors through which serotonin signals to generate simultaneous  
132 vm1 and vm2 calcium transients.

133 To test this hypothesis, we recorded calcium transients in the vulval muscles of *C. elegans*  
134 carrying *ser-1* or *ser-7* null mutations. We expressed the calcium reporter GCaMP5 in the egg-  
135 laying muscles and performed one-hour optical recordings of these muscles within freely-behaving  
136 animals as previously described (Collins and Koelle, 2013; Brewer et al., 2019).

137 As controls for the serotonin receptor mutant recordings, we first recorded egg-laying  
138 muscle calcium activity in wild-type animals as well as in *tph-1* and/or *nlp-3* null mutant animals.  
139 Wild-type animals showed two different types of calcium transients in their vulval muscles: 1)  
140 “vm1-only” transients restricted to the vm1 muscles; and 2) “vm1 + vm2” transients that occurred  
141 simultaneously in both the vm1 and vm2 muscles (Figure 2A). We never observed a vm2 transient

142 to occur in the absence of a vm1 transient. Wild-type worms had vm1-only transients distributed  
143 throughout the entire one-hour recordings (Figure 2B and Figure 2-figure supplement 1). In  
144 contrast, vm1 + vm2 transients tended to occur in clusters, known as egg-laying active phases  
145 (Waggoner et al., 1998; Brewer et al., 2019), during which a subset of vm1 + vm2 transients were  
146 accompanied by release of one or more eggs (Figure 2B and Figure 2-figure supplement 1). In the  
147 wild-type, about 17% of the total vulval muscle calcium transients were vm1 + vm2 transients  
148 (Figure 3). When *tph-1* (i.e. serotonin) or *nlp-3* were knocked out, there was a modest reduction  
149 in the percent of vm1 + vm2 transients (Figure 3B) that correlated with the modest egg laying  
150 defects in these mutants (Figure 1E and I, and Figure 1-figure supplement 2A). Knocking out *tph-*  
151 *1* and *nlp-3* together resulted in both an increase in the number of vm1-only transients and a  
152 reduction in the number of vm1 + vm2 transients, which combined to produce a significant  
153 reduction in the percent of total transients that were of the vm1 + vm2 type (Figure 2B, Figure 2-  
154 figure supplement 6, Figure 3). The reduction in the percent of vm1 + vm2 transients correlated  
155 with the strong egg-laying defect in the *tph-1; nlp-3* double mutant (Figure 1E and Figure 1-figure  
156 supplement 2B). Our recordings in these control genotypes reproduced the findings of Brewer et  
157 al. (2019) and confirmed that signaling by serotonin and NLP-3 neuropeptides together lead to the  
158 simultaneous activity of the vm1 and vm2 vulval muscles that drives egg laying.

159         Next, we examined the effects of null mutations for SER-1 and SER-7. Single mutants for  
160 *ser-1* or *ser-7* each showed a modest reduction in the percentage of vm1 + vm2 transients (Figure  
161 2B, Figure 2-figure supplements 3 and 4, and Figure 3), which is likely responsible for the modest  
162 reduction in egg laying seen in these mutants (Figure 1E, G, and H). Crossing the *ser-1* or *ser-7*  
163 serotonin receptor null mutants into the *nlp-3* null mutant background isolated serotonin signaling  
164 through the remaining serotonin receptor as the remaining driver of egg laying. Both the *nlp-3 ser-*



165 *1* and *ser-7 nlp-3* double mutants showed a strong reduction in the percentage of vm1 + vm2  
166 transients (Figure 2B, Figure 2-figure supplements 7 and 8, and Figure 3), which correlated with  
167 the strong egg-laying defects seen in these double mutants (Figure 1E, J, and K). Indeed, for the  
168 *nlp-3 ser-1* double mutant, the defects in egg laying and in the percent of vm1 + vm2 transients  
169 were as strong as those of the *tph-1; nlp-3* double mutant (Figure 1E and Figure 3B). The defects  
170 in vm1 + vm2 transients in the *ser-7 nlp-3* double mutant were also severe, but slightly less so than  
171 those of the *tph-1; nlp-3* double mutant (Figure 3). Together, these data show that endogenous  
172 serotonin signals through both the  $G\alpha_q$ -coupled SER-1 and  $G\alpha_s$ -coupled SER-7 receptors to  
173 coordinate simultaneous vm1 and vm2 vulval muscle transients, and thus egg laying. Knocking  
174 out either receptor appears to severely reduce the ability of endogenously-released serotonin to  
175 activate the vm2 egg-laying muscles.

176

177 **The SER-1 and SER-7 receptors are required on the egg-laying muscles for serotonin to**  
178 **stimulate egg laying**

179 We sought to determine if the SER-1 and SER-7 serotonin receptors are required on the  
180 egg-laying muscles themselves to allow serotonin to initiate egg laying. Applying the method  
181 developed by Esposito et al. (2007), we used RNAi to cell-specifically knock down genes in the  
182 egg-laying muscles. We used the *unc-103e* promoter to drive expression of double-stranded RNA  
183 (dsRNA) transcripts specifically in the egg-laying muscles of worms. To ensure that the RNAi  
184 effect would remain restricted to the egg-laying muscle cells, these experiments were done in null  
185 mutants for SID-1, a double-stranded RNA channel which can allow RNAi to spread from cell to  
186 cell (Winston et al., 2002).

187           We tested the ability of our RNAi system to knock down gene expression specifically in  
188 the egg-laying muscles by using animals carrying a transgene that used a 12 kb *ser-7* promoter to  
189 express the SER-7 receptor fused to the green fluorescent protein (SER-7::GFP). This transgene  
190 expresses SER-7::GFP in all the cells that normally express SER-7, which includes cells in the  
191 egg-laying system (Figure 1A; all the egg laying muscle cells and the VC neurons) as well as a set  
192 of head neurons (Figure 4A). In these animals, when we used the egg-laying muscle specific  
193 promoter to express *ser-7* dsRNA, there was a dramatic loss of SER-7::GFP fluorescence in the  
194 egg-laying muscles of 22/25 of worms examined (Figures 4B and D), but no noticeable loss of  
195 SER-7::GFP from head neurons (Figure 4B) or VC neurons (Figure 4D), which lie immediately  
196 adjacent to the egg-laying muscles. This knockdown was also gene-specific, since expression of a  
197 control dsRNA rather than *ser-7* dsRNA did not result in loss of SER-7::GFP fluorescence (Figures  
198 4A and C). We note, however, that our RNAi transgenes may not result in complete knockdown  
199 of gene expression, and thus the results described below may reflect partial rather than complete  
200 knockdown of gene expression in the egg-laying muscles.

201           We used the egg-laying muscle-specific RNAi system to knock down either *ser-1* or *ser-7*  
202 in the *C. elegans* egg-laying muscles and then tested the ability of exogenous serotonin to induce  
203 egg laying. In controls in which neither receptor was knocked down, 22/25 animals laid one or  
204 more eggs in response to exogenous serotonin over 30 minutes. In contrast, almost none of the *ser-*  
205 *1* knockdown animals and less than half of the *ser-7* knockdown animals laid any eggs after  
206 serotonin treatment, and for both receptor knockdowns the average number of eggs laid was  
207 significantly reduced (Figure 4E). To test if *ser-1* and *ser-7* are also required in the egg-laying  
208 muscles for endogenous serotonin to stimulate egg laying, we used the same *ser-1* or *ser-7* egg-  
209 laying muscle-specific knockdown strains but did not treat with exogenous serotonin and instead

210 simply measured the accumulation of unlaidd eggs in adult animals. We saw significant increases  
211 in unlaidd eggs accumulated for both the *ser-1* and *ser-7* knockdowns (Figure 4-figure supplement  
212 1). The mildness of these increases was expected since whole-animal null mutants for these  
213 receptors have relatively mild effects (Figure 1E). These cell-specific RNAi results show that both  
214 SER-1 and SER-7 are required on the egg-laying muscles for serotonin to properly induce egg  
215 laying.

216

217 **G $\alpha_q$  and G $\alpha_s$  signaling are required in the egg-laying muscles to combine endogenous signals**  
218 **that stimulate egg laying**

219 We next investigated whether the G proteins through which SER-1 and SER-7 signal, G $\alpha_q$   
220 and G $\alpha_s$ , respectively, are necessary in the egg-laying muscles for proper egg laying in response  
221 to endogenous signals within the animal. We used our RNAi system to knock down the genes for  
222 G $\alpha_q$  and G $\alpha_s$  specifically in the egg-laying muscles and measured the accumulation of unlaidd eggs.

223 We found that RNAi knockdown of G $\alpha_q$  or G $\alpha_s$  in the egg-laying muscles had mild but  
224 significant effects on the accumulation of unlaidd eggs, but that knocking down both G $\alpha$  proteins  
225 together had a stronger effect (Figure 5). This strong defect was not the result of the G $\alpha_q$ /G $\alpha_s$   
226 double knockdown causing developmental defects in the egg-laying muscles, since a) the egg-  
227 laying muscle-specific *unc-103e* promoter used to express dsRNA for these gene knockdowns only  
228 turns on in the egg-laying muscles as the muscle cells are completing their terminal differentiation  
229 (Ravi et al., 2018); and b) we labeled the egg-laying muscles with a fluorescent protein in G $\alpha_q$ /G $\alpha_s$   
230 double knockdown animals and saw no visible morphological defects in these muscle cells (Figure  
231 5-figure supplement 1). The mild defects seen in the single G $\alpha$  knockdowns are difficult to  
232 interpret, since we are not certain of the extent to which RNAi reduced the levels of the G $\alpha$

233 proteins. Even so, we note that the strong egg-laying defect that resulted from  $G\alpha_q/G\alpha_s$  double  
234 knockdown in the egg-laying muscles (Figures 5) is stronger than the egg-laying defects observed  
235 in animals with complete knockouts of both *ser-1* and *ser-7*, or in animals with a *tph-1* knockout  
236 that completely eliminates endogenous serotonin (Figure 1E, G, and H and Figure 1-figure  
237 supplement 2A and 2C). Therefore, serotonin appears not to be the only signal that generates  $G\alpha_q$   
238 and  $G\alpha_s$  activity in the egg-laying muscles to stimulate egg laying. These data indicate that there  
239 must be other GPCRs on the egg-laying muscles, in addition to SER-1 and SER-7, that signal  
240 through  $G\alpha_q$  and  $G\alpha_s$  to stimulate egg laying. Therefore, normal levels of egg-laying activity result  
241 from  $G\alpha_q$  and  $G\alpha_s$  acting in the egg-laying muscles to combine signals from SER-1, SER-7, and  
242 additional GPCRs.

243

244 **Overexpressed SER-1 is sufficient to allow serotonin to induce egg laying in the absence of**  
245 **SER-7**

246 Results presented above show that knocking out or knocking down either the SER-1 or  
247 SER-7 serotonin receptors result in severe defects in the ability of serotonin to induce egg laying.  
248 In some cases, the defects observed were as strong as those caused by knocking out both SER-1  
249 and SER-7 at the same time or as strong as those seen when completely eliminating serotonin with  
250 a *tph-1* null mutation (Figure 1E). These results raise the question of whether serotonin absolutely  
251 requires both SER-1/ $G\alpha_q$  and SER-7/ $G\alpha_s$  signaling to induce egg laying, or whether these two  
252 signaling pathways might rather combine to induce egg laying in a more nuanced fashion. Thus,  
253 we designed several different experiments to determine if increasing the strength of just one of the  
254 two pathways could induce egg laying in the absence of the other pathway.

255           The first method was to simply overexpress one serotonin GPCR by increasing the copy  
256 number of the GPCR gene. Previous genetic studies have shown that overexpression can increase  
257 the normal functions of a GPCR in a manner that is suppressed by knocking out the endogenous  
258 ligand for that GPCR (Ringstad and Horvitz, 2008; Harris et al., 2010; Brewer et al., 2019;  
259 Fernandez et al., 2020), suggesting that the overexpressed GPCR is activated by its endogenous  
260 ligand to signal at a higher level than would the endogenous levels of the GPCR. Indeed,  
261 overexpressing SER-1 in *C. elegans* was shown to increase egg laying in a manner completely  
262 dependent on endogenous serotonin (Fernandez et al., 2020).

263           To overexpress serotonin receptors, we used chromosomally-integrated transgenes that  
264 carry multiple copies of the complete *ser-1* or *ser-7* genes, including their own promoters, resulting  
265 in overexpression of these genes in the same cells that normally express them (Fernandez et al.,  
266 2020). We tested the ability of exogenous serotonin to induce egg laying in animals overexpressing  
267 one serotonin receptor while also carrying a deletion mutation for the other serotonin receptor. Our  
268 results are graphed in Figure 6, and the design and logic of this experiment are schematized in  
269 Figure 6-figure supplement 1. We found that animals overexpressing *ser-7* in a *ser-1*-null  
270 background were not able to lay eggs in response to exogenous serotonin, similar to animals that  
271 simply lacked *ser-1*. However, animals overexpressing *ser-1* in a *ser-7*-null background did lay  
272 eggs in response to exogenous serotonin, unlike animals that simply lacked *ser-7*.

273           These results show that while SER-1/ $G\alpha_q$  signaling is normally not sufficient to allow  
274 serotonin to induce egg laying in the absence of SER-7/ $G\alpha_s$  signaling, artificially increasing SER-  
275 1 expression levels overcomes this limitation. It is difficult to interpret the negative result from the  
276 converse experiment, in which overexpressed SER-7 failed to induce egg laying in the absence of  
277 SER-1. It could be that our SER-7 overexpression experiment may have not increased SER-7/ $G\alpha_s$

278 signaling to a high enough level to induce egg laying in the absence of SER-1/ $G\alpha_s$  signaling or it  
279 could mean that SER-7 alone is incapable of driving egg-laying. Thus, we devised additional  
280 methods, described below, to artificially increase  $G\alpha_q$  and/or  $G\alpha_s$  signaling in the egg-laying  
281 muscles and determine which pathway(s) are sufficient to drive egg laying.

282

### 283 **$G\alpha_q$ or $G\alpha_s$ signaling in the egg-laying muscles is sufficient to drive egg laying**

284 A previous study developed a DREADD (Designer Receptor Exclusively Activated by  
285 Designer Drugs; Lee et al., 2014) to activate  $G\alpha_q$ -signaling in *C. elegans* in response to the drug  
286 clozapine N-oxide (CNO) (Prömel et al., 2016). We acutely activated  $G\alpha_q$ -signaling specifically  
287 in the egg-laying muscles by transgenically expressing this designer  $G\alpha_q$ -coupled receptor using  
288 the egg-laying muscle specific promoter and treating the worms with CNO. This induced egg  
289 laying (Figure 7A and B). In contrast, worms carrying a control transgene were unable to lay eggs  
290 in response to CNO (Figure 7A).

291 Next, we determined if  $G\alpha_s$ -signaling in the egg-laying muscles was sufficient to drive egg  
292 laying. To date there is no designer  $G\alpha_s$ -coupled receptor that is functional in *C. elegans* (Prömel  
293 et al., 2016) and we were unsuccessful in further attempts to design such a receptor (data not  
294 shown).  $G\alpha_s$  signals by activating adenylyl cyclase, which in turn generates cAMP. A  
295 photoactivatable adenylyl cyclase (PAC) has been successfully used in the cholinergic neurons  
296 and body wall muscles of *C. elegans* to evoke changes in locomotion (Steuer Costa et al., 2017;  
297 Henss et al., 2022). We generated transgenic animals that express PAC in their egg-laying muscles  
298 and found that blue light activation of PAC was able to induce egg laying in these worms, whereas  
299 control worms carrying an empty vector transgene were unable to lay eggs in response to blue light  
300 (Figure 7C and D, and Video 1). These results demonstrate that activation of either the  $G\alpha_q$  or  $G\alpha_s$

301 pathways in the egg-laying muscles is sufficient to induce egg laying, and that these G protein  
302 signals can originate from sources other than a serotonin receptor.

303

304 **The combination of two subthreshold signals from different  $G\alpha_q$ -coupled receptors in the**  
305 **egg-laying muscles is sufficient to drive egg laying**

306 The results above demonstrate that artificially-induced  $G\alpha_q$  or  $G\alpha_s$  signaling in the egg-  
307 laying muscles can be sufficient to induce egg laying. However, we also found that neither  
308 endogenous SER-1/ $G\alpha_q$  signaling alone nor endogenous SER-7/ $G\alpha_s$  signaling alone in these same  
309 egg-laying muscles is sufficient to drive egg laying; instead, both these endogenous signaling  
310 pathways must be active at the same time to induce egg laying. To reconcile these findings, we  
311 hypothesized that the endogenous levels of SER-1/ $G\alpha_q$  and SER-7/ $G\alpha_s$  signaling are both  
312 “subthreshold,” i.e., occur at low levels that are not sufficient to properly activate egg laying on  
313 their own, and together sum to reach the threshold necessary to activate egg laying.

314 To test this hypothesis, we generated an artificial subthreshold G protein signal that was  
315 unable to activate egg laying on its own and determined if it was capable of activating egg laying  
316 when combined with another subthreshold G protein signal. The designer  $G\alpha_q$ -coupled receptor  
317 offered the potential to tune the levels of  $G\alpha_q$  signaling it induces: we titrated the concentration of  
318 its CNO ligand to find a concentration (2 mM) that was just below the threshold required to activate  
319 egg laying on its own (Figure 8A). We then expressed the designer  $G\alpha_q$ -coupled receptor in the  
320 egg-laying muscles of worms lacking the SER-7 receptor, so that serotonin could only signal to  
321 induce egg laying via SER-1/ $G\alpha_q$  (Figure 8C). Exposure to either exogenous serotonin or to 2 mM  
322 CNO was unable to induce egg laying, as expected. However, when both exogenous serotonin and

323 2 mM CNO were applied to the worm at the same time, these two subthreshold  $G\alpha_q$ -coupled  
324 signals combined to activate egg laying (Figures 8B and C).

325

## 326 **Discussion**

327 The principal finding of this study is that the SER-1 and SER-7 serotonin receptors, as well as  
328 additional  $G\alpha_q$  and/or  $G\alpha_s$  coupled receptors, all signal together in the *C. elegans* egg-laying  
329 muscles to help induce their coordinated contraction and thus the laying of eggs. While signaling  
330 from endogenous levels of just one of these receptors alone is not strong enough to induce egg  
331 laying, together the signals from multiple types of GPCRs on the same cells combine to reach a  
332 threshold that can activate egg laying (Figure 9). This study is perhaps the most detailed to date of  
333 how cells within an intact organism integrate signaling by multiple GPCRs to generate a concerted  
334 response to the complex mixture of chemical signals impinging upon them. Such signal integration  
335 is a challenge faced by virtually all cells within multicellular organisms, and the findings from our  
336 study of how this is accomplished in the *C. elegans* egg-laying muscles likely generalize to similar  
337 situations faced by other cells.

338

## 339 **Multiple GPCRs signal through $G\alpha_q$ and $G\alpha_s$ to activate excitable cells**

340 We found that knocking down both  $G\alpha_q$  and  $G\alpha_s$  in the egg-laying muscles resulted in a  
341 dramatic defect in egg laying, while loss of the SER-1 and SER-7 serotonin receptors that activate  
342 these G proteins, either from the entire animal or from the egg-laying muscles alone, only had a  
343 modest effect. Therefore, serotonin appears to combine with other endogenous signals to generate  
344 sufficient  $G\alpha_q$  and  $G\alpha_s$  signaling in the egg-laying muscles to induce egg laying. Treating animals  
345 with a high concentration of exogenous serotonin is sufficient to induce egg laying, and, even in



346 this artificial situation, both the SER-1 and SER-7 receptors must operate in parallel on the egg-  
347 laying muscles to mediate this effect, as loss of either receptor from the egg-laying muscles results  
348 in almost complete loss of the ability of exogenous serotonin to induce egg laying. We were able  
349 to generate artificial circumstances in which activation of a single type of GPCR on the egg-laying  
350 muscles (either overexpressed SER-1 or the designer CNO receptor) could induce egg laying.  
351 Additionally, activation of the signaling pathway downstream of SER-7 with a photoactivatable  
352 adenylyl cyclase was sufficient to induce egg laying. Nonetheless, our results show that the normal  
353 situation in wild-type animals is that egg laying is induced by the combined signaling from  
354 multiple  $G\alpha_q$ - and  $G\alpha_s$ -coupled receptors.

355         What other signals besides serotonin might be acting on the egg-laying muscles to promote  
356 egg laying? The neuropeptide NLP-3 is co-released with serotonin onto the egg-laying muscles to  
357 promote egg laying (Brewer et al., 2019), and it is possible that the NLP-3 receptor, which has not  
358 yet been identified, is one of the additional GPCRs expressed on these muscles. If so, the NLP-3  
359 receptor would combine its effects with those of the SER-1 and SER-7 serotonin receptors to  
360 induce egg laying. NLP-3 signaling on its own, like signaling from the serotonin receptors,  
361 produces modest effects, with dramatic defects in egg laying seen only when both NLP-3 and  
362 serotonin signaling are lost simultaneously. A systematic analysis of the expression of all *C.*  
363 *elegans* neurotransmitter GPCRs on the egg-laying muscles (Fernandez et al., 2020) found that,  
364 besides SER-1 and SER-7, three additional  $G\alpha_q$ - and  $G\alpha_s$ -coupled GPCRs are expressed on these  
365 cells: the dopamine receptor DOP-4, the tyramine receptor TYRA-3, and the metabotropic  
366 acetylcholine receptor GAR-3. Just as for SER-1 and SER-7, knockouts for any one of these  
367 receptors have, at most, modest effects on the accumulation of unlaidd eggs (Fernandez et al., 2020),

368 consistent with the hypothesis that the G proteins  $G\alpha_q$  and  $G\alpha_s$  integrate signals from a variety of  
369 GPCRs on the egg-laying muscles to maintain proper egg laying.

370 Our finding that multiple GPCRs combine signaling in the egg-laying muscles of *C.*  
371 *elegans* to induce strong behavioral effects appears to be a general feature of GPCR signaling in  
372 excitable cells within multicellular organisms. Heterotrimeric G protein signaling in *C. elegans*  
373 neurons and muscles has been studied intensively for decades (reviewed by Koelle, 2018). These  
374 studies have included a variety of forward genetic screens for mutants with various behavioral  
375 defects resulting from disruption of G protein signaling (Trent et al., 1983; Desai and Horvitz,  
376 1989; Bargmann et al., 1993; Miller et al., 1996; Bany et al., 2003). Together, these screens have  
377 been carried out on a saturation scale such that mutations in perhaps every gene involved in  
378 heterotrimeric G protein signaling have been sampled to identify those that are critical to control  
379 the behaviors studied. These screens have produced a large set of mutants for the G proteins  
380 themselves, the Regulators of G protein Signaling (RGS proteins) that terminate signaling, and the  
381 proteins that act downstream of the G proteins. However, mutants for GPCRs are almost absent  
382 from the results of these screens (Koelle, 2018). There is also a conspicuous paucity of GPCR  
383 mutations that have arisen from the century of forward genetic screens that have been carried out  
384 in *Drosophila*, despite GPCRs constituting the single largest family of proteins in metazoan  
385 organisms such as worms and flies (Hanlon and Andrew, 2015). One possible explanation for this  
386 paradox could be that GPCR mutations are generally lethal, however, GPCR knockout mutations  
387 generated in these model invertebrates are rarely, if ever, lethal and typically do not show overtly  
388 obvious behavioral defects (e.g. Fernandez et al., 2020). Thus, the near absence of GPCR mutants  
389 arising in *C. elegans* or *Drosophila* behavioral genetic screens suggests that loss of a single  
390 neurotransmitter or neuropeptide GPCR rarely causes significant defects in the behaviors that have

391 been studied, even though mutations in heterotrimeric G proteins show severe defects in the control  
392 of these same behaviors. This paradox can be resolved if, as in egg laying, multiple GPCRs  
393 combine their signaling to result in behavioral effects.

394         Studies of G protein signaling in vertebrate cardiomyocytes (heart muscle cells) parallel  
395 our finding in *C. elegans* egg-laying muscles that multiple co-expressed GPCRs together regulate  
396 muscle contractility. A number of neurotransmitters and neuropeptides modulate heart muscle  
397 function, and their roles in heart disease have prompted studies of the GPCRs on cardiomyocytes  
398 that mediate the effects of these signals (Wang et al., 2018; Lympelopoulous et al., 2021). These  
399 include four receptors that mediate signaling by epinephrine and norepinephrine: the  $G\alpha_s$ -coupled  
400  $\beta_1$ - and  $\beta_2$ -adrenergic receptors (Bristow et al., 1986), and the  $G\alpha_q$ -coupled  $\alpha_{1a}$ - and  $\alpha_{1b}$ -  
401 adrenergic receptors (McCloskey et al., 2003; O'Connell et al., 2003). Cardiomyocytes also  
402 express  $G\alpha_q$ -coupled receptors for the peptide hormones vasopressin (Xu and Gopalakrishnan,  
403 1991) and angiotensin II (Meggs et al., 1993). While it is clear that together these signals and  
404 receptors regulate heart muscle contractility and that each plays crucial roles mediating heart  
405 disease, it is less clear how these multiple signals and receptors combine their effects within the  
406 intact organism to orchestrate proper control of heart muscle function. The *C. elegans* egg-laying  
407 muscles provide a more easily manipulatable genetic model system for understanding how  
408 multiple GPCR signals together regulate muscle function.

409

#### 410 **How do $G\alpha_q$ and $G\alpha_s$ signals combine to modulate activity of excitable cells?**

411         In the *C. elegans* egg laying circuit, our results suggest serotonin released by the HSNs  
412 acts directly on the egg-laying muscles to make these muscle cells more excitable, enabling other  
413 signals that depolarize the muscle cells to trigger the simultaneous vm1 + vm2 muscle cell

414 contractions that release eggs. Previous work has identified other signals released by cells other  
415 than the HSNs onto the egg-laying muscles to depolarize the muscle cells and act as the final  
416 trigger for contraction. The VC neurons release acetylcholine at synapses onto the vm2 egg-laying  
417 muscle cells (see Figure 1), which acts via acetylcholine-gated ion channels (i.e. nicotinic  
418 receptors) to excite the vm2 cells (Kopchock et al., 2021). The vm1 muscle cells separately receive  
419 an as-yet uncharacterized excitatory signal during every body bend (Collins and Koelle, 2013), but  
420 this signal does not trigger egg-laying muscle contractions unless the HSN neurons have first  
421 released serotonin and/or NLP-3 neuropeptides (Brewer et al., 2019). Our results in this work show  
422 that serotonin enables contraction responses in the egg-laying muscles by acting via both the  $G\alpha_q$ -  
423 coupled SER-1 and  $G\alpha_s$ -coupled SER-7 receptors.

424         Studies in vertebrate heart muscle suggest mechanisms by which  $G\alpha_q$  and  $G\alpha_s$  signaling  
425 may together promote muscle contraction.  $G\alpha_s$  signaling is proposed to promote contraction  
426 through a complex mechanism in which  $G\alpha_s$  activates adenylyl cyclase to produce cAMP, which  
427 in turn binds and activates protein kinase A (PKA), causing PKA to phosphorylate a variety of  
428 targets that promote contractility (reviewed by Salazar et al., 2007). The proposed effects of PKA  
429 include phosphorylating the L-type  $Ca^{2+}$  channel to promote extracellular  $Ca^{2+}$  entry into the  
430 muscle cell, phosphorylating the ryanodine receptor (a  $Ca^{2+}$  channel on internal membranes) to  
431 promote  $Ca^{2+}$  release from internal stores, and phosphorylating the  $Ca^{2+}$ -binding muscle filament  
432 protein troponin to promote the ability of  $Ca^{2+}$  to trigger contraction.  $G\alpha_q$  signaling has complex  
433 effects on vertebrate heart function, including some that could combine with  $G\alpha_s$  signaling to  
434 promote muscle contraction (Lin et al., 2001; McCloskey et al., 2003). First,  $G\alpha_q$  activates its  
435 effector phospholipase C to ultimately lead to phosphorylation of  $G\alpha_s$ -coupled  $\beta$ -adrenergic  
436 receptors, altering their mode of signaling and thus the ability of epinephrine to regulate muscle

437 contraction (Wang et al., 2018). Second,  $G\alpha_q$  and  $G\alpha_s$  signaling can collaborate to activate  $IP_3$   
438 receptors which, like ryanodine receptors, are  $Ca^{2+}$  channels that release  $Ca^{2+}$  from internal stores  
439 to promote muscle contraction. In this mechanism,  $G\alpha_q$  directly activates the enzyme  
440 phospholipase C (Smrcka et al., 1991; Taylor et al., 1991), which generates the second messenger  
441  $IP_3$  that directly binds and activates the  $IP_3$  receptor.  $G\alpha_s$  signaling, as noted above, activates the  
442 protein kinase PKA, which can phosphorylate and activate  $IP_3$  receptors (Taylor, 2017).

443         The mechanism by which  $G\alpha_q$  and  $G\alpha_s$  signaling alter muscle and neuron function has been  
444 independently addressed through other studies in *C. elegans*. In the egg-laying muscles, genetic  
445 studies show  $G\alpha_q$  promotes contraction mainly not via phospholipase C (Dhakal et al., 2022), as  
446 suggested by vertebrate heart muscle studies (Salazar et al., 2007), but rather by activating the  
447 other major  $G\alpha_q$  effector, the RhoGEF protein Trio, which in turn activates the small G protein  
448 Rho (Chikumi et al., 2002; Lutz et al., 2005; Lutz et al., 2007, Rojas et al., 2007; Williams et al.,  
449 2007). The different conclusions reached in vertebrate heart versus *C. elegans* egg-laying muscles  
450 may reflect differences in how  $G\alpha_q$  regulates these two types of muscles or rather could reflect the  
451 different experimental approaches used to study these two systems.

452         Our work, as well as previous studies in *C. elegans*, have also examined the relationship  
453 between  $G\alpha_q$  and  $G\alpha_s$  signaling. Studies of neurons in the *C. elegans* locomotion circuit suggest  
454 that  $G\alpha_q$  signaling provides a core function that activates neuron output while  $G\alpha_s$  signaling  
455 potentiates a downstream step in  $G\alpha_q$  signaling. For example, hyperactivation of the  $G\alpha_q$  pathway  
456 could rescue locomotion defects seen in  $G\alpha_s$  reduction of function mutants, yet hyperactivation of  
457 the  $G\alpha_s$  pathway could not rescue locomotion defects seen in  $G\alpha_q$  reduction of function mutants  
458 (Reynolds et al., 2005). Our work shows that activating high enough levels of either  $G\alpha_q$  or  $G\alpha_s$   
459 signaling alone in the *C. elegans* egg-laying muscles is sufficient to promote egg laying. However,

460 our studies were carried out within intact animals in which low levels of both  $G\alpha_q$  and  $G\alpha_s$   
461 signaling may occur in the background as we hyperactivate one of these signaling pathways. We  
462 also used RNAi to knock down either  $G\alpha_q$  or  $G\alpha_s$  in the egg laying muscles and observed only  
463 partial inhibition of egg laying, but we cannot ensure that knockdown of the  $G\alpha$  proteins was  
464 complete. Because null mutations in  $G\alpha_q$  and  $G\alpha_s$  are lethal in *C. elegans* (Reynolds et al., 2005),  
465 it is not straightforward to generate more rigorous genetic studies of the relationship of these two  
466 signaling pathways.

467

## 468 **Conclusions**

469 Combining signaling by multiple G protein coupled receptors appears to be a universal  
470 mechanism used to modulate activity of neurons and muscle cells in multicellular organisms. The  
471 logic of why multiple GPCRs are found on a single cell and how these GPCR signals can  
472 meaningfully funnel through just a few types of  $G\alpha$  proteins has long been a mystery. Our work  
473 shows that within an intact animal, multiple  $G\alpha_q$ - and  $G\alpha_s$ -coupled receptors co-expressed on the  
474 same cells each generate weak signals that individually have little effect but sum together to  
475 produce enough signaling output to impact behavior. This system allows a cell to gather multiple  
476 independent pieces of information from the complex soup of chemical signals in its environment  
477 and compute an appropriate response. In the case of the *C. elegans* egg-laying system, the multiple  
478 neurotransmitters and neuropeptides released by the egg-laying circuit are sensed to determine  
479 when conditions are right for the animal to lay an egg. More generally, this system for computing  
480 outcomes by integrating multiple inputs provides neurons and muscles with a vastly flexible  
481 mechanism for processing information.

482

## 483 **Materials and Methods**

### 484 **Strains and culture**

485 A complete list of the *C. elegans* strains and transgenes used in this paper is found in  
486 Supplementary File 1. *C. elegans* were maintained at 20°C on standard nematode growth media  
487 (NGM) seeded with OP50 strain of *Escherichia coli* as their food source. Mutants and animals  
488 carrying chromosomally-integrated transgenes were backcrossed 2-10x to N2 (wild type) to  
489 generate clean genetic backgrounds, as indicated in Supplementary File 1. New strains were  
490 constructed using standard genetic cross procedures and genotypes were confirmed by PCR  
491 genotyping or sequencing. Extrachromosomal array transgenic strains were generated through  
492 microinjection. Phenotypes were typically scored in animals from  $\geq 5$  independent transgenic lines,  
493 and at least one independent line has been frozen for storage. Supplementary File 1 details the  
494 strains used and how each transgenic strain was constructed.

495

### 496 **Molecular biology**

497 The construction of the plasmids used in this manuscript are described in Supplementary File 1.

498

### 499 **Egg-laying muscle specific RNAi**

500 Transgenic animals with egg-laying muscle specific RNAi were created as described in Esposito  
501 et al. (2007). PCR was used to fuse the *unc-103e* promoter upstream of an exon-rich region of the  
502 gene target by RNAi. To increase the yield of the fusion PCR product, NEBuilder HIFI DNA  
503 Assembly Mix (NEB) was used to fuse the promoter fragment to the exon-rich gene fragment prior  
504 to nested PCR. Two fusion PCR products for each gene of interest were injected into *C. elegans*,  
505 one expressing sense RNA and the other antisense RNA. The sense and antisense RNA strands

506 anneal in the cell to form the dsRNA used for RNAi. Due to the highly identical sequences of  $G\alpha_q$   
507 and  $G\alpha_s$ , care was taken to choose dissimilar regions of the genes encoding  $G\alpha_q$  and  $G\alpha_s$  to target  
508 with RNAi. The regions chosen had no more than 14 bp of contiguous sequence identity. 50-100  
509 ng/ $\mu$ l of fusion PCR product expressing sense RNA and 50-100 ng/ $\mu$ l of fusion PCR product  
510 expressing antisense RNA were injected into *sid-1(qt9) V; lin-15(n765ts) X* animals along with  
511 10ng/ $\mu$ l pCFJ90 (pharyngeal mCherry co-injection marker), 50ng/ $\mu$ l pL15EK (*lin-15(+)* co-  
512 injection marker), and 25ng/ $\mu$ l DH5alpha genomic DNA digested with BamHI/HindIII. The *sid-*  
513 *1(qt9)* mutation kept the RNAi cell-specific by preventing cell-to-cell spreading of the RNAi via  
514 systemic RNAi. Supplementary File 1 details the construction of the fusion PCR products,  
515 including the exact concentrations injected for each DNA and the sequences used for the *unc-103e*  
516 promoter region and each exon-rich gene region that was targeted by RNAi. During the  
517 knockdown of G proteins, mCherry was expressed in the egg-laying muscles to demonstrate that  
518 the G protein knockdown did not interfere with muscle development (Figure 5–supplement 1).  
519 There was no statistical difference between the number of eggs retained in animals in expression  
520 (data not shown).

521

## 522 **Calcium imaging**

523 Animals were staged as late-L4 larvae and recorded 24 hours later. Freely-behaving animals were  
524 mounted between a glass coverslip and a  $\sim 1$  cm<sup>2</sup> chunk from an NGM plate containing OP50 food  
525 for imaging as previously described (Collins and Koelle, 2013, Collins et al., 2016, Ravi et al.,  
526 2018). A brightfield and two fluorescence channels (for the green GCaMP calcium sensor and a  
527 control mCherry protein) were recorded with a 20X air objective using a Zeiss LSM 880  
528 microscope. Recordings were collected at  $\sim 16$  fps at 256 x 256 pixel, 16 bit resolution, for 1 hour.



529 Three 1-hour recordings were collected for each genotype studied. As previously described  
530 (Brewer et al., 2019), calcium imaging was recorded in both the vm1 and vm2 vulval muscles  
531 simultaneously and ratiometric analysis of the calcium recordings was performed in Volocity  
532 (PerkinElmer) to generate traces of calcium transients. As described in Brewer et al. (2019), a  
533 video of each peak was examined and scored as vm1-only or vm1 + vm2.

534

### 535 **Confocal imaging**

536 Animals were mounted on microscope slides with 2% agarose pads containing 120 mm Optiprep  
537 (Sigma Millipore) to reduce refractive index mismatch (Boothe et al., 2017) and a 22×22–1  
538 microscope cover glass (Fisher Scientific) was placed on top of the agarose pad. Animals were  
539 anesthetized using a drop of 150 mM sodium azide (Sigma Millipore) with 120 mm Optiprep. Z-  
540 stack confocal images of *C. elegans* staged 24 hours post L4 were taken on a Zeiss LSM 880  
541 microscope using a 40X water-immersion objective lens.

542

### 543 **Serotonin-induced egg laying on NGM plates**

544 This assay was adapted from the work of Hobson et al. (2006). NGM plates containing 26 mM  
545 serotonin creatine sulfate monohydrate (Sigma, H7752-5G) were poured and seeded with OP50  
546 one day prior to assay. Animals were staged as late L4 larvae for assay 24 hours later. At time 0  
547 of the assay, 5-10 worms were placed on the serotonin plates, spaced in a manner that it was  
548 unlikely they would be able to crawl near each other prior to being paralyzed by the serotonin.  
549 Serotonin induced paralysis, which resulted in the worms remaining adjacent to the eggs they laid  
550 during the time course, making it was possible to attribute the number of eggs laid to each  
551 individual worm.

552

553 **Serotonin- or CNO-induced egg laying in M9 buffer**

554 Animals were staged as late L4 larvae for assay 24 hours later. Serotonin creatine sulfate  
555 monohydrate from Sigma (H7752-5G) and Clozapine N-oxide dihydrochloride (CNO) from Fisher  
556 Scientific (sourced from Tocris Bioscience (6329/10)) were dissolved to desired concentrations in  
557 M9 buffer. 10  $\mu$ l drops of serotonin, CNO, or a combination of the two were placed on the lid of  
558 a 96-well plate. At time 0 a single worm was placed in each drop of drugged buffer and after 30  
559 minutes the number of eggs by each worm laid was counted under a dissecting microscope.

560

561 **Optogenetic activation of photoactivatable adenylyl cyclase to induce egg laying**

562 Animals were staged as late L4 larvae for assay 24 hours later. A photoactivatable adenylyl cyclase  
563 (PAC) from *Beggiatoa sp* (amplified from pET28a-ec\_bPAC, a gift from Peter Hegemann  
564 (Addgene plasmid # 28135)) or empty vector control was transgenically expressed in the egg-  
565 laying muscles of *C. elegans* with a *lite-1 (ce314)* background. Worms were kept in foil covered  
566 boxes and maintained quickly under dim light to avoid premature activation of the PAC. 24 hours  
567 prior to the experiment, single L4 worms were transferred to a new NGM plate containing OP50  
568 and returned to the dark. Both the PAC and empty vector control used the *unc-103e* promoter and  
569 were co-injected with *unc-103ep::mCherry*. On the day of the experiment only animals with  
570 visible mCherry in their vulva muscles were selected to be assayed. A Leica M165FC microscope  
571 equipped with GFP filter set and a digital camera was used to record the experiment. The camera's  
572 exposure settings were adjusted so the activation of the GFP filters set's blue emission light would  
573 be visible on screen. At time 0 the worm was illuminated with  $18.2 \text{ mW/cm}^2$  of  $470 \pm 20 \text{ nm}$  blue

574 light from the microscope's GFP filter set. The number of eggs laid during 1 minute of blue light  
575 illumination was recorded.

576

### 577 **Quantification of unlaidd eggs**

578 Animals were staged as L4 larva 30 hours prior to assay. Quantitation of unlaidd eggs was  
579 performed as described in Chase and Koelle (2004).

580

### 581 **Statistical analysis**

582 Error bars shown in all graphs represent 95% confidence intervals. All statistical analysis was  
583 analyzed using GraphPad Prism version 9.3.1 software. Calcium imaging transients in the vm1  
584 and vm2 muscles (Figure 3) were analyzed using a contingency analysis and Fisher's exact test  
585 with two-sided P-values and Bonferroni correction method for multiple comparisons. Egg-laying  
586 assays involving CNO-induced activation of the DREADD  $G\alpha_q$  receptor were analyzed in Figure  
587 7 using the unpaired t-test with a two-tailed P value with the assumption that both populations  
588 had the same standard deviation and in Figure 8 using two-way ANOVA analysis with Šídák's  
589 multiple comparisons test. Egg-laying assays involving optogenetic activation of  
590 photoactivatable adenylyl cyclase were analyzed unpaired t-test with a two-tailed P value and  
591 assumed both populations had the same standard deviation. All other statistical analyses were  
592 performed using one-way ANOVA analysis with Šídák's multiple comparisons test.

593

594

### 595 **Data and software availability**

### 596 **Acknowledgements**

597 Some strains were provided by the CGC, which is funded by NIH Office of Research  
598 Infrastructure Programs (P40 OD010440) and the Mitani laboratory, Japan National  
599 BioResource Project (NBRP). This work was funded by NIH R01 grants NS086932 and  
600 NS036918. We thank the Yale Center for Advanced Light Microscopy Facility for their  
601 assistance with confocal microscopy.

602

603

#### 604 **Declaration of Interests**

605 The authors declare no competing interests

606

#### 607 **Author Contributions**

608 Andrew C. Olson:

609 conceptualization, methodology, validation, formal analysis, investigation, resources, writing-  
610 original draft, writing review & editing, visualization, supervision, project administration

611 Allison M. Butt:

612 validation, investigation, writing review & editing

613 Nakeirah T.M. Christie:

614 investigation, writing review & editing, visualization

615 Ashish Shelar:

616 software

617 Michael R. Koelle:

618 conceptualization, methodology, writing-original draft, writing review & editing, visualization,  
619 supervision, project administration, funding acquisition

Figure 1

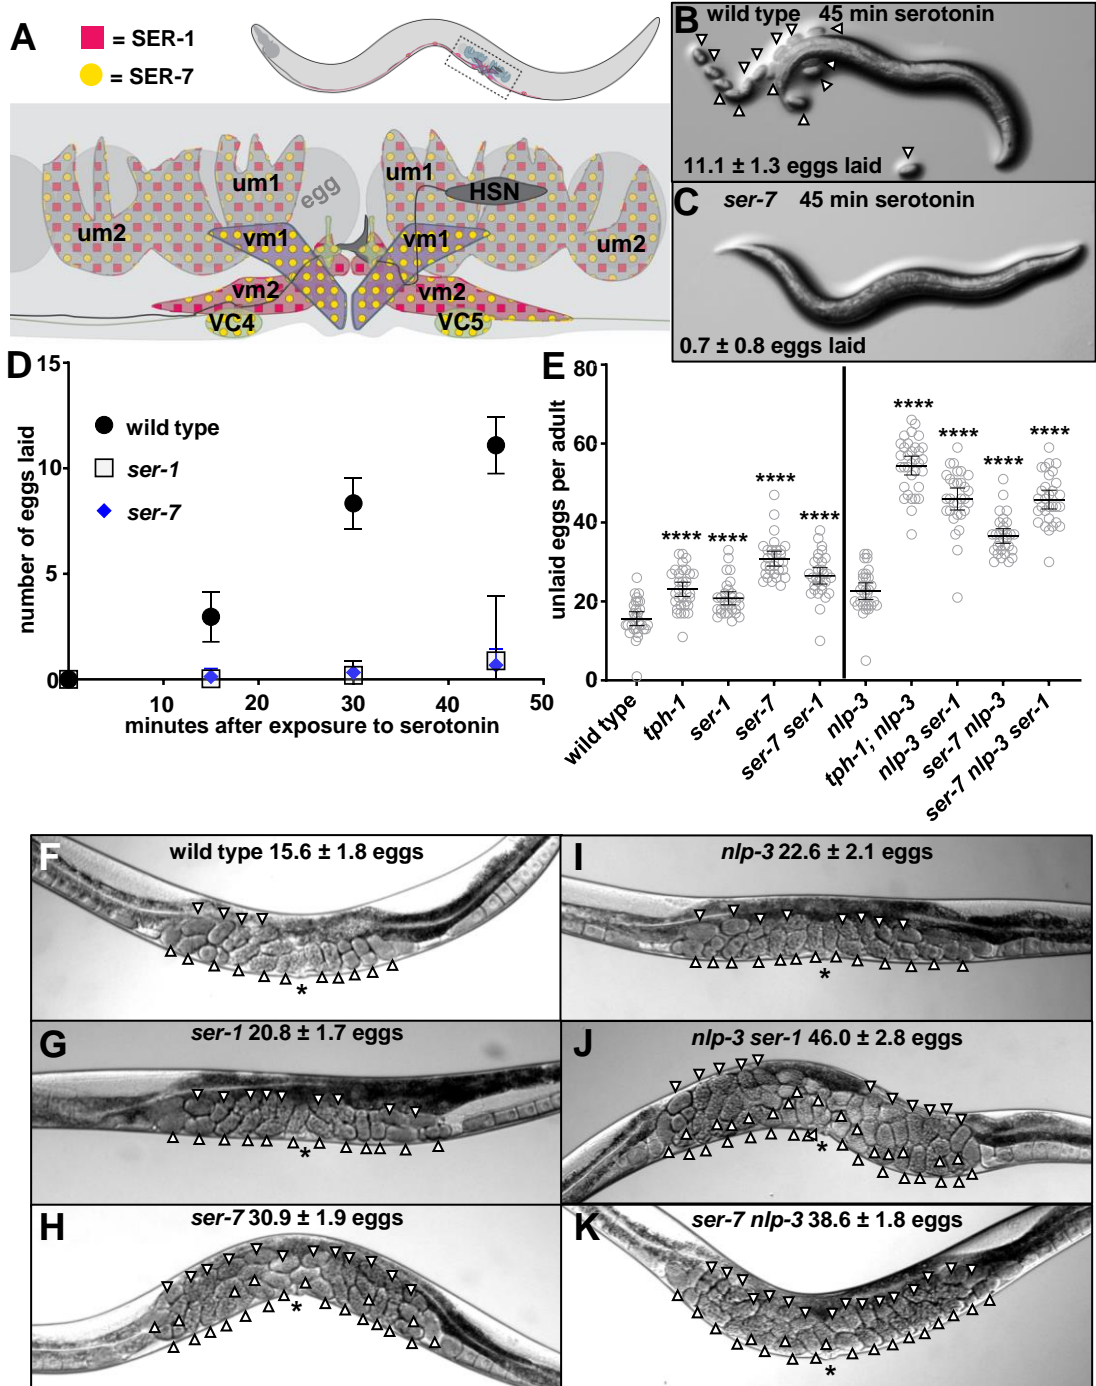

620 **Figure 1. The serotonin receptors SER-1 and SER-7 are co-expressed on cells of the egg-**  
621 **laying circuit and loss of either blocks the ability of serotonin to stimulate egg laying. (A)**  
622 Schematic of the *C. elegans* egg-laying system. Yellow circles denote cells that express SER-1  
623 and pink squares denote cells that express SER-7. The HSN neurons and the vm1, vm2, um1, and  
624 um2 muscle cells each occur in left/right pairs, but only the cells on the left side of the animal are  
625 shown in this schematic. VC4 and VC5 are single neurons. **(B, C)** Serotonin-induced egg-laying  
626 assays for wild-type or *ser-7* knockout worms. Worms were photographed 45 minutes after being  
627 placed on plates containing 26 mM serotonin. Serotonin partially paralyzed the worms so that they  
628 remained adjacent to their laid eggs, which are indicated by arrowheads. The average number of  
629 laid eggs for each genotype in this assay is shown. **(D)** Results of a time course using the same  
630 assay illustrated in panels **B** and **C** for wild-type, *ser-1*, and *ser-7* null mutant animals. The assay  
631 was repeated with 10 worms/plate at least 3 times per genotype. **(E)** Average number of unlaidd  
632 eggs per adult worm,  $n \geq 30$  for each genotype. Genotypes left of the vertical black line are  
633 statistically compared to wild-type control animals. Genotypes right of the line are statistically  
634 compared to *nlp-3* single-mutant control animals. \*\*\*\* =  $p < 0.0001$  for these comparisons. **(F-K)**  
635 Photographs of individual worms illustrating the accumulation of unlaidd eggs (indicated by white  
636 arrowheads) in some of the genotypes analyzed in **(E)**. The vulval slit is indicated by \*.  
637 Photographs of individual worms for the remaining genotypes are shown in Figure 1-figure  
638 supplement 1. The average number of unlaidd eggs for each genotype is also indicated. All  
639 measurements are given with 95% confidence intervals.

640

641

Figure 1—figure supplement 1

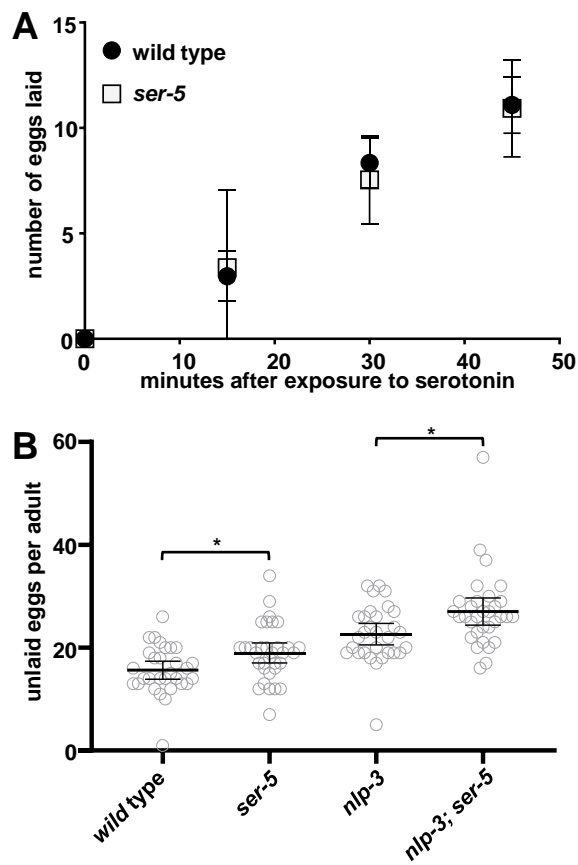

642 **Figure 1-figure supplement 1. The SER-5 serotonin receptor has only minor effects on egg**  
643 **laying. (A)** Results of a time course in which worms were placed on plates containing 26 mM  
644 serotonin. The number of eggs laid was counted for wild-type and *ser-5* mutant animals. The assay  
645 was repeated with 10 worms/plate at least three times per genotype. **(B)** Average number of unlaidd  
646 eggs per adult worm,  $n \geq 30$  for each genotype. \* =  $p < 0.05$ . All measurements are given with 95%  
647 confidence intervals.

648

649

650

651

652

653

654

655

656

657

658

659

660

661

662

663



Figure 1—figure supplement 2

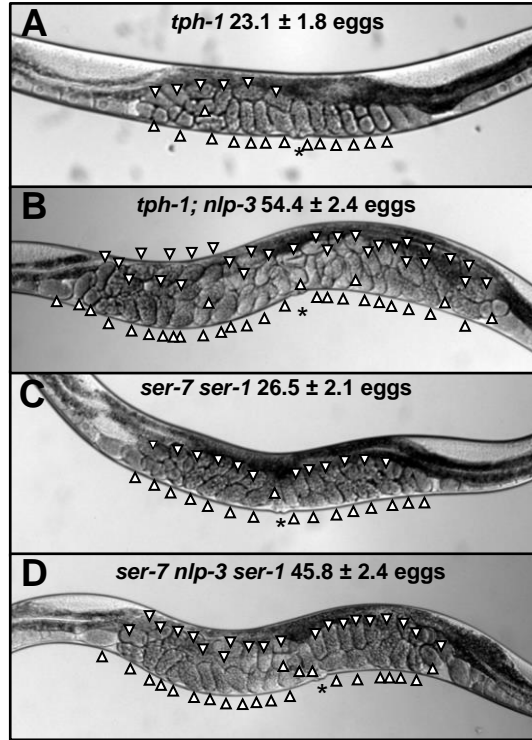

664 **Figure 1-figure supplement 2. Egg accumulation in additional genotypes. (A-D)** Photographs  
665 of worms of the indicated genotypes, with unlaied eggs indicated by arrowheads. The vulval slit is  
666 indicated by \*. The average number of unlaied eggs for each genotype is indicated. All  
667 measurements are given with 95% confidence intervals.

668

669

670

671

672

673

674

675

676

677

678

679

680

681

682

683

684

685

686

Figure 2

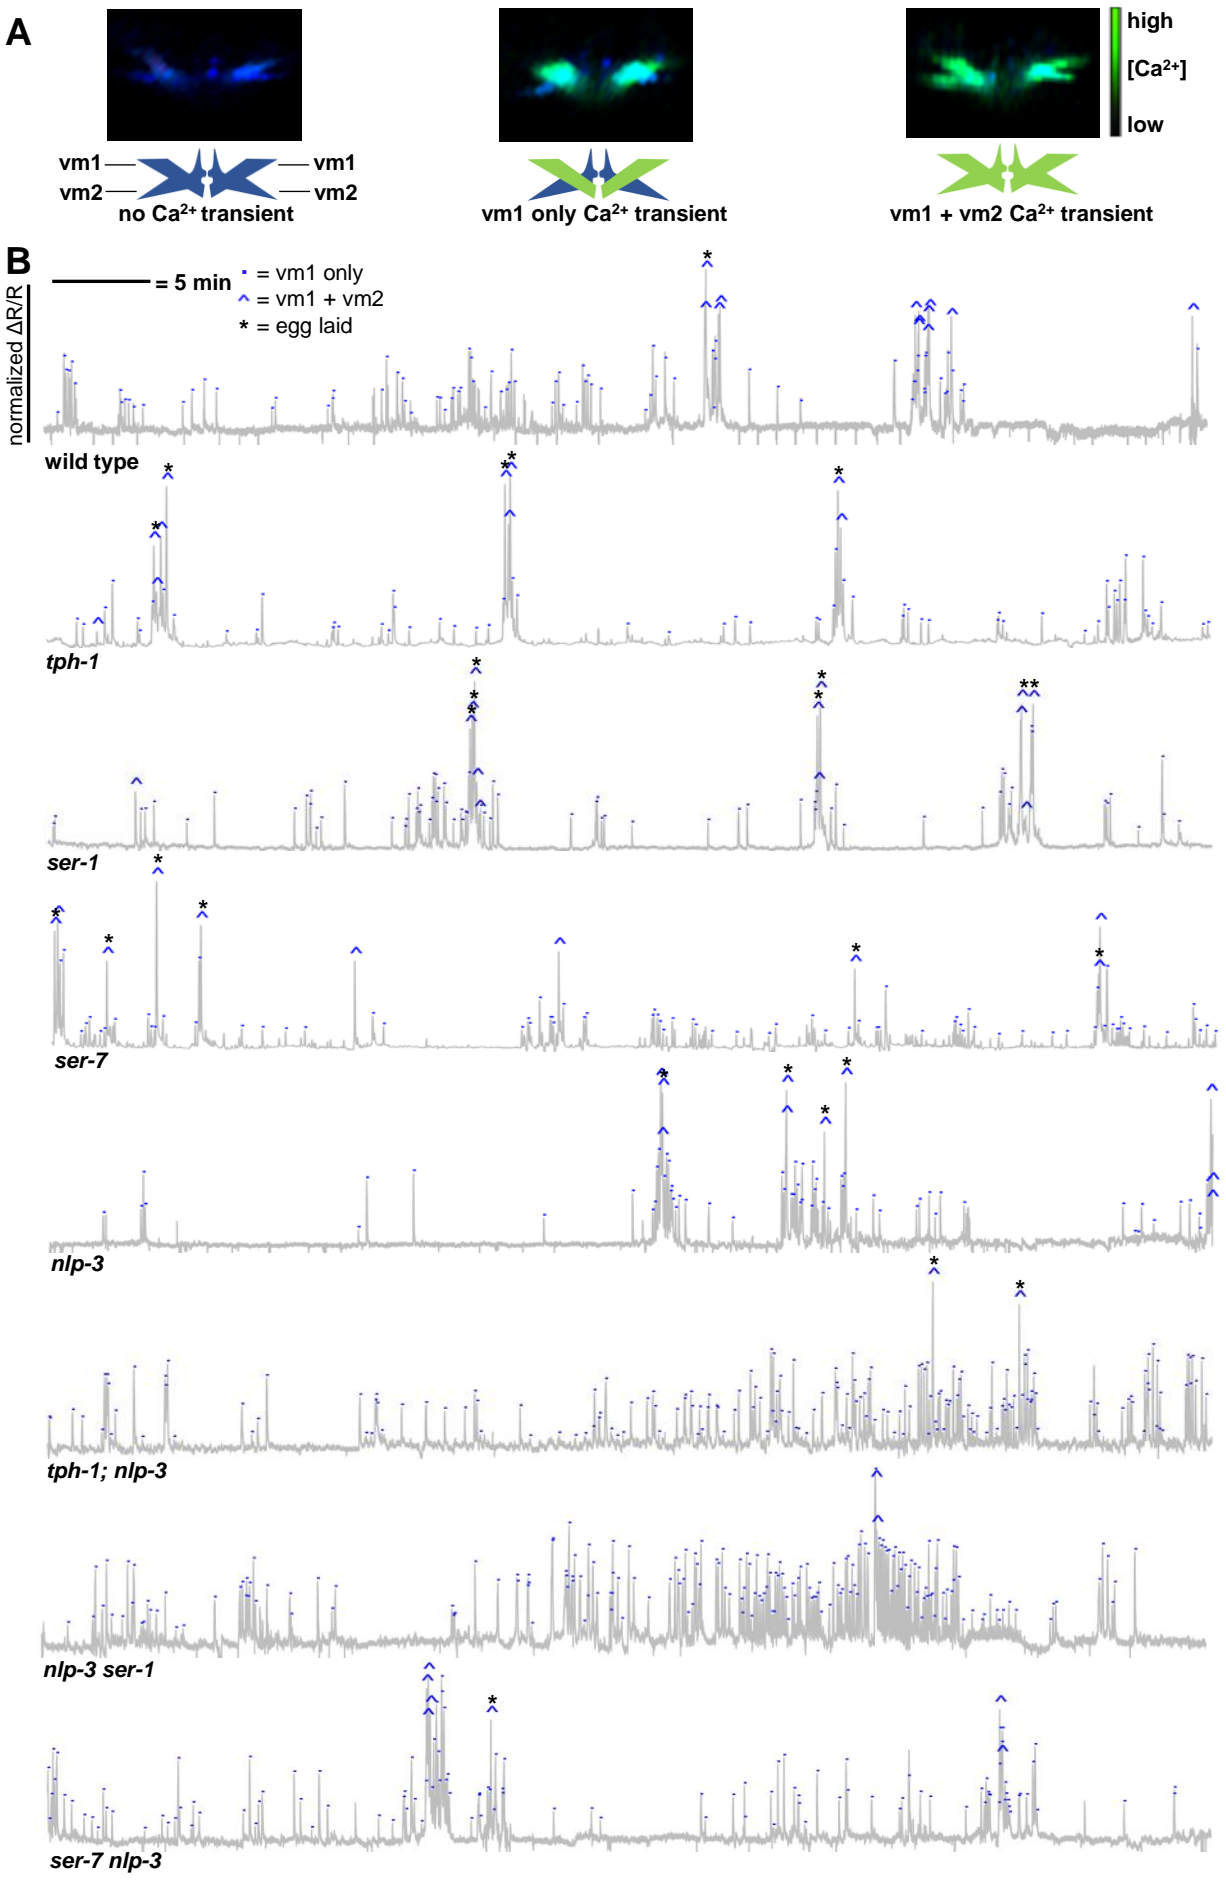

687 **Figure 2. Serotonin signals through SER-1 and SER-7 to coordinate vm1 and vm2 vulval**  
688 **muscle calcium transients.** (A) Representative still frames from ratiometric calcium imaging of  
689 one-hour video recordings of vulval muscles depicting no calcium transient (left), a vm1-only  
690 calcium transient (center), and a simultaneous vm1 + vm2 calcium transient (right). The mCherry  
691 channel is rendered in blue and the GCaMP channel is superimposed in green, with intensity  
692 rendered by ranging from transparent (low calcium) to bright green (high calcium). (B) Calcium  
693 traces representing one-hour recordings of changes in the GCaMP5/mCherry ratio ( $\Delta R/R$ ) in the  
694 vulval muscles of individual worms. Each trace is of a representative animal from the genotype  
695 indicated. All traces for each genotype are shown in Figure 2-figure supplements 1-8. Vertical  
696 scales have been normalized to the highest peak height within each trace. Each calcium peak was  
697 manually scored as vm1-only, marked with a blue dot, or simultaneous vm1 + vm2, marked with  
698 a blue caret (^), and transients associated with release of one or more eggs are indicated by asterisks  
699 (\*).  
700

figure 2 supplement 1

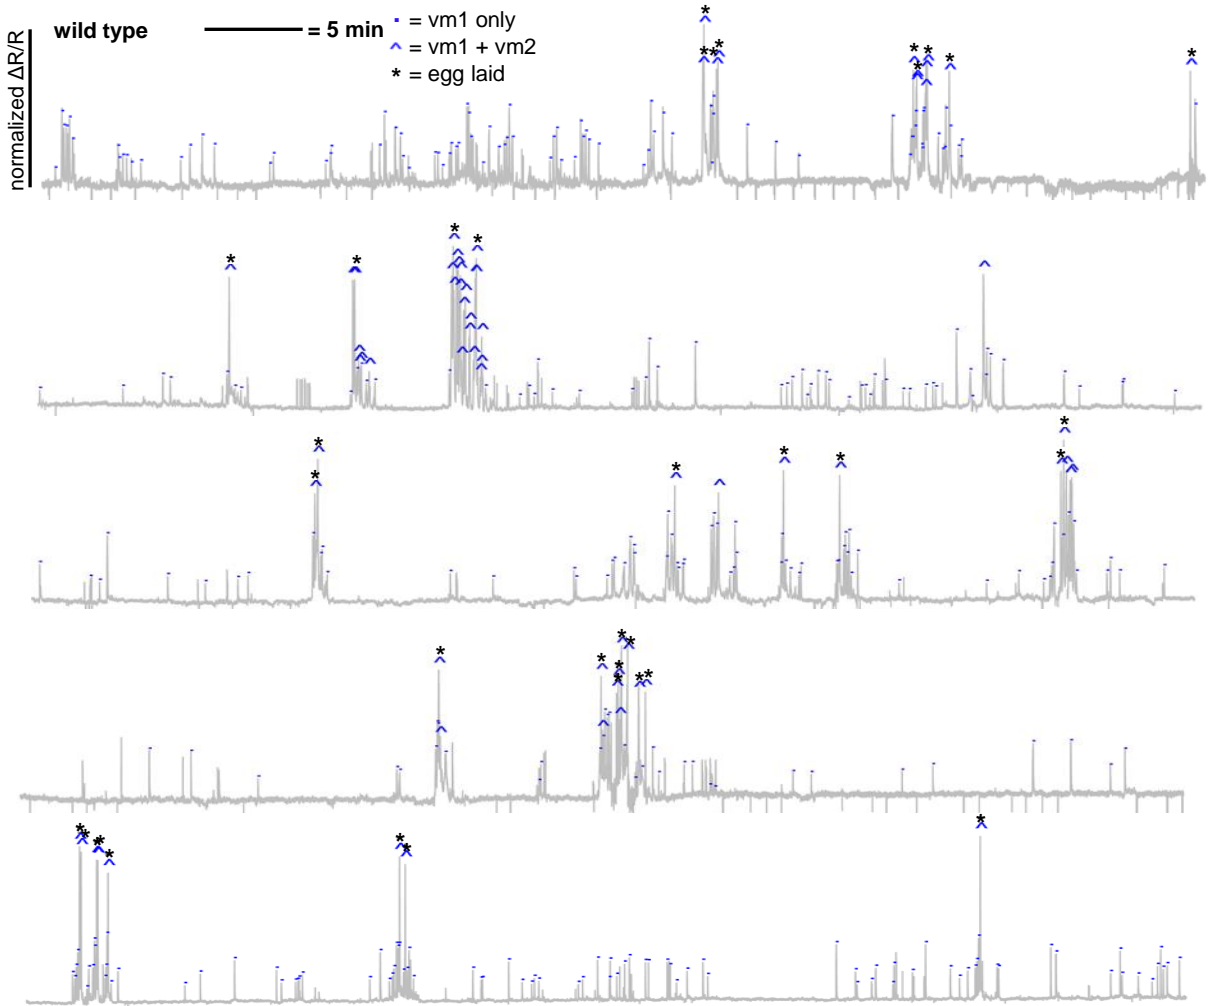

701 **Figure 2-figure supplement 1. Vulval muscle Ca<sup>2+</sup> traces in a wild-type background,**  
702 **recorded for one hour each in five different animals.**

703

704

figure 2 supplement 2

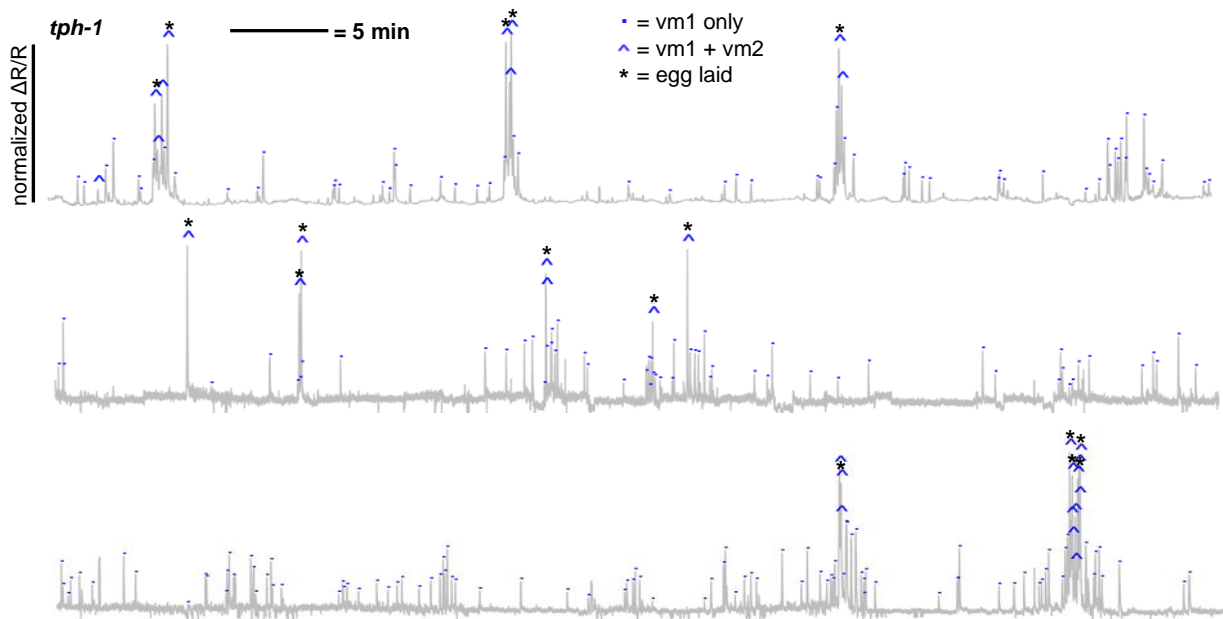

705 **Figure 2-figure supplement 2. Vulval muscle Ca<sup>2+</sup> traces in a *tph-1* null mutant background,**  
706 **recorded for one hour each in three different animals.**  
707



figure 2 supplement 3

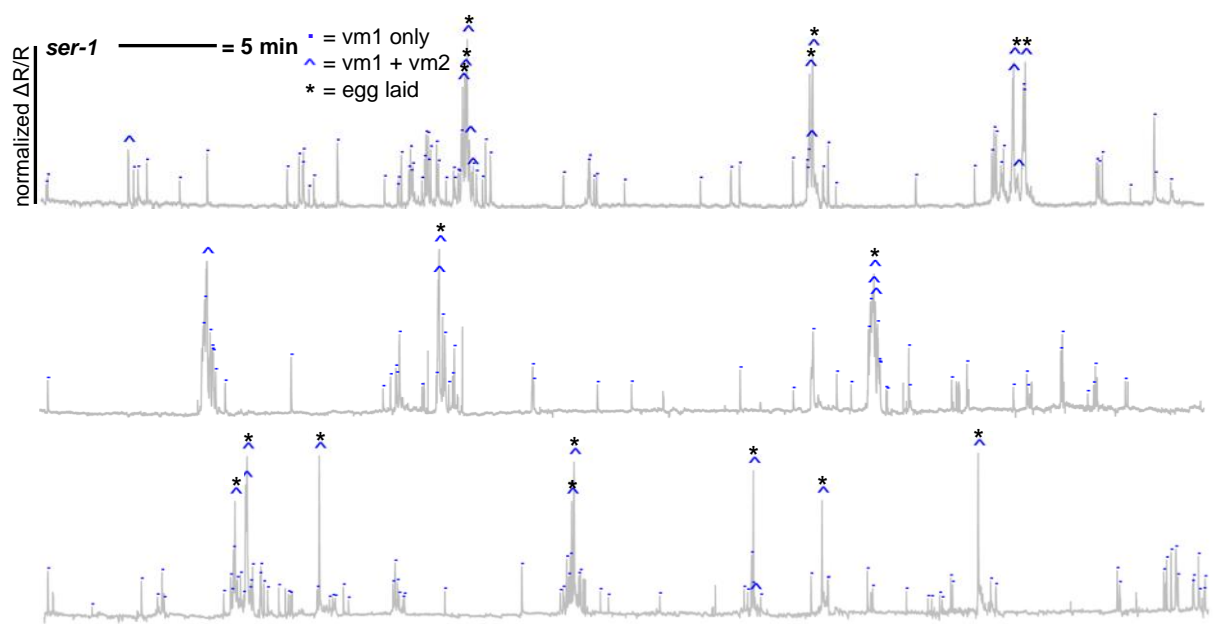

708 **Figure 2-figure supplement 3. Vulval muscle Ca<sup>2+</sup> traces in a *ser-1* null mutant background,**  
709 **recorded for one hour each in three different animals.**  
710

figure 2 supplement 4

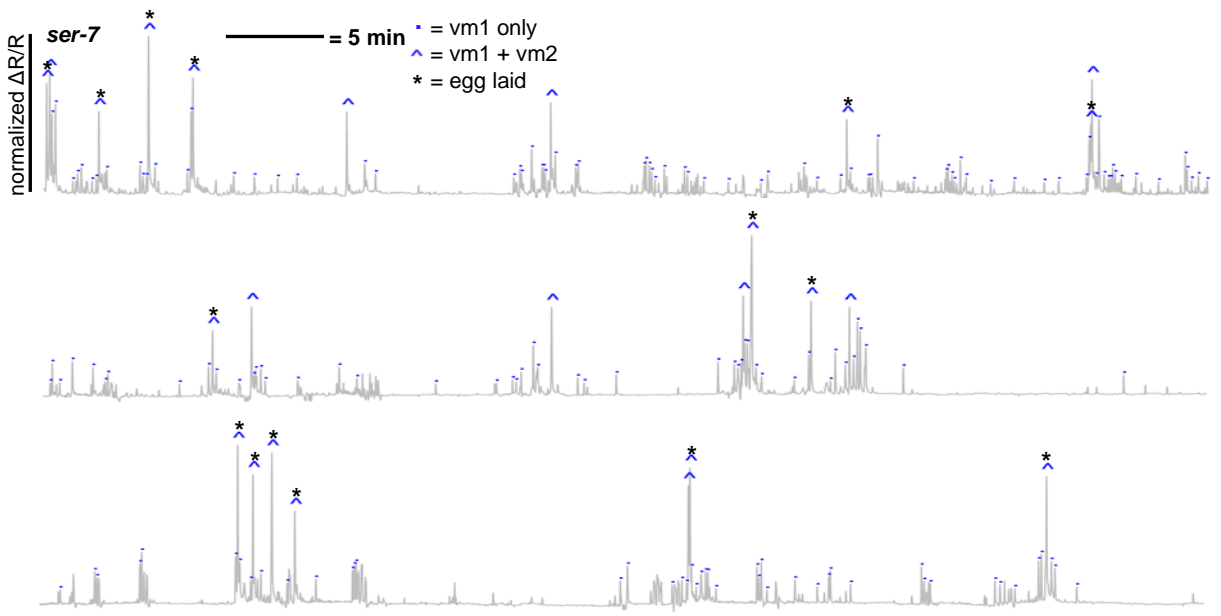

711 **Figure 2-figure supplement 4. Vulval muscle Ca<sup>2+</sup> traces in a *ser-7* null mutant background,**  
712 **recorded for one hour each in three different animals.**  
713

figure 2 supplement 5

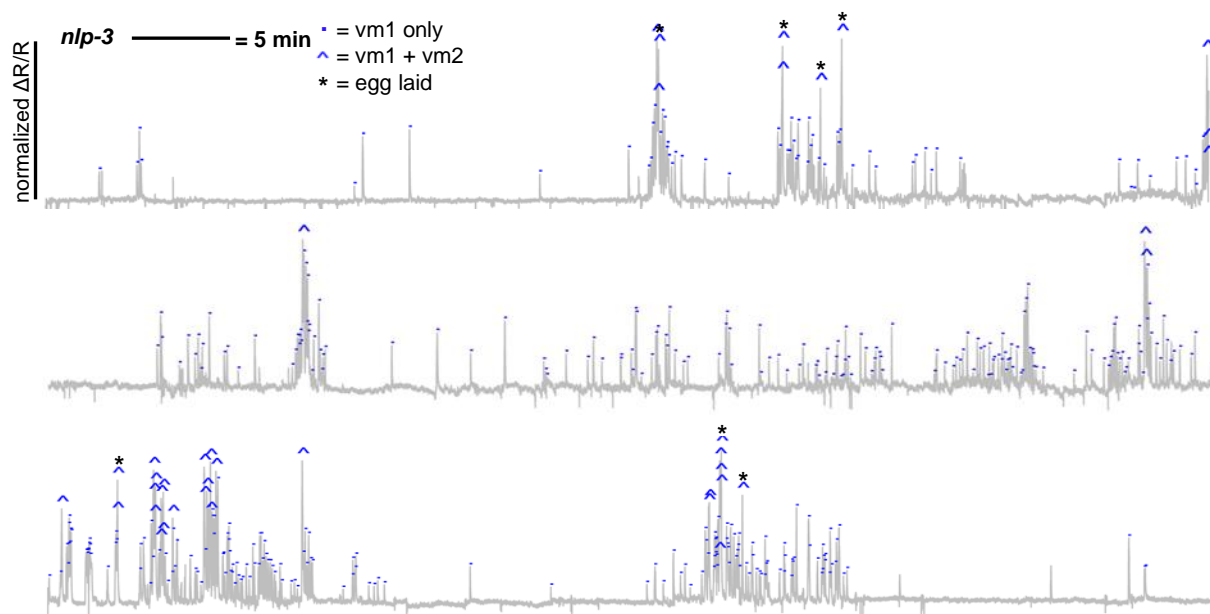

714 **Figure 2-figure supplement 5. Vulval muscle Ca<sup>2+</sup> traces in a *nlp-3* null mutant background,**  
715 **recorded for one hour each in three different animals.**  
716

figure 2 supplement 6

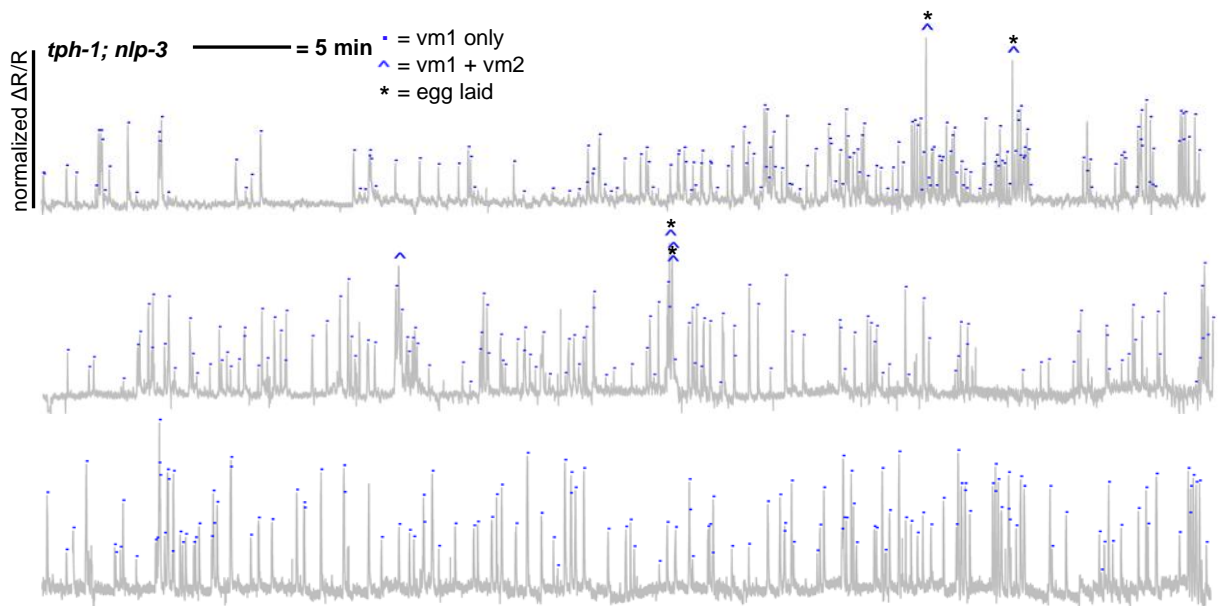

717 **Figure 2-figure supplement 6. Vulval muscle Ca<sup>2+</sup> traces in a *tph-1; nlp-3* double null mutant**  
718 **background, recorded for one hour each in three different animals.**  
719



figure 2 supplement 7

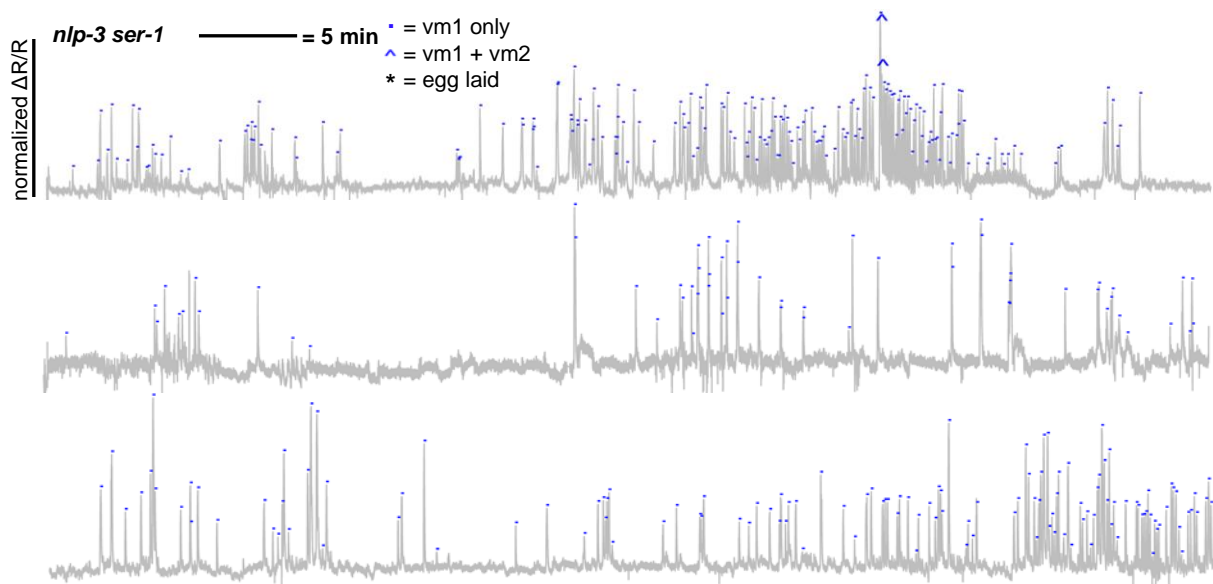

720 **Figure 2-figure supplement 7. Vulval muscle Ca<sup>2+</sup> traces in a *nlp-3 ser-1* double null mutant**  
721 **background, recorded for one hour each in three different animals.**  
722

figure 2 supplement 8

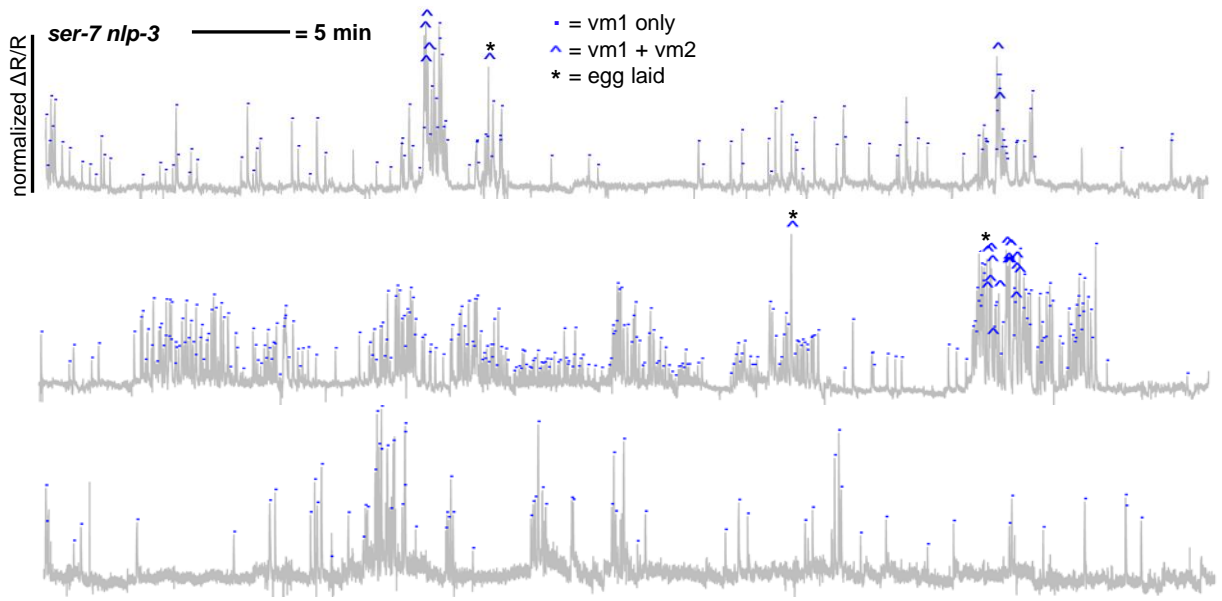

723 **Figure 2-figure supplement 8. Vulval muscle Ca<sup>2+</sup> traces in a *ser-7 nlp-3* double null mutant**  
724 **background, recorded for one hour each in three different animals.**  
725

Figure 3

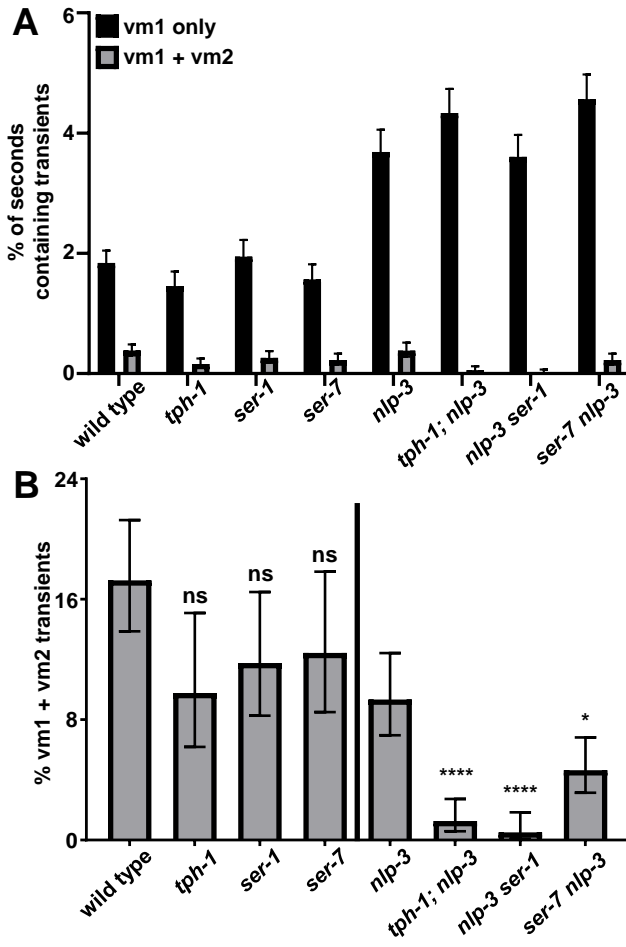

726 **Figure 3. SER-1 and SER-7 are each required for serotonin to signal with NLP-3 to properly**  
727 **induce simultaneous vm1 + vm2 egg-laying muscle contractions.** (A) Percent of seconds during  
728 one-hour recordings that contained either vm1-only or simultaneous vm1 + vm2 calcium  
729 transients, averaged from five wild-type recordings and three recordings for each mutant genotype.  
730 (B) Percentage of total calcium transients that were of the vm1 + vm2 type. Genotypes to the left  
731 of the vertical black line were statistically compared to the wild type and genotypes to the right of  
732 the vertical black line were statistically compared to *nlp-3*. ns = not significant, \* =  $p < 0.05$ , \*\* =  
733  $p < 0.01$ , \*\*\*\* =  $p < 0.0001$ . Comparing *tph-1;nlp-3* to *nlp-3 ser-1* gave  $p > 0.05$  (not significant),  
734 whereas comparing *tph-1;nlp-3* to *ser-7 nlp-3* gave  $p < 0.005$ . All measurements are given with  
735 95% confidence intervals.

736

737

738

739

740

741

742

743

744

745

746

747

748

Figure 4

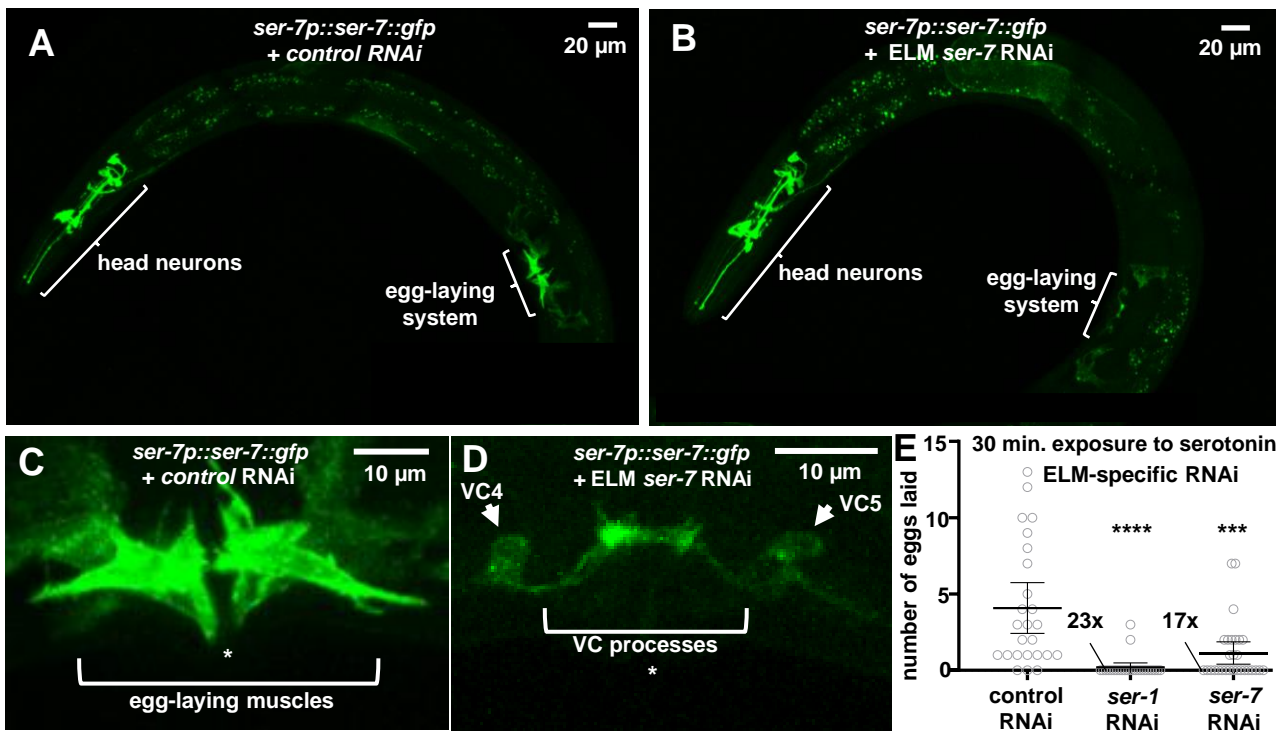

749 **Figure 4. SER-1 and SER-7 are required on the egg-laying muscles for serotonin to stimulate**  
750 **egg laying.** (A) Image of a transgenic animal in which the *ser-7* promoter (*ser-7p*) drives  
751 expression of the SER-7 receptor fused to GFP. GFP fluorescence is seen in a set of head neurons  
752 and in the muscles and VC neurons of the egg-laying system. As a negative control, this animal  
753 also expresses dsRNA for *ser-1* using an egg-laying muscle specific promoter (ELM), which fails  
754 to knock down expression of the *ser-7::gfp* transcript, and thus it does not affect GFP fluorescence.  
755 (B) Image of an animal from the same *ser-7p::ser-7::gfp* strain, but with *ser-7* dsRNA expressed  
756 in the egg-laying muscles. Absence of GFP fluorescence in the egg-laying muscles alongside the  
757 continued presence of fluorescence in the head neurons indicates successful cell-specific  
758 knockdown of *ser-7::gfp*. (C, D) Close-up images of the egg-laying system of the same animals  
759 shown in (A) and (B). Knockdown of GFP fluorescence in the egg-laying muscles in (D) reveals  
760 the fainter GFP fluorescence of the neighboring VC neurons that was obscured in (C). Asterisks  
761 (\*) denote location of the vulval slit. (E) Eggs laid per animal after 30 minutes of exposure to  
762 exogenous serotonin for the indicated genotypes. RNAi was induced specifically in the egg-laying  
763 muscles.  $n \geq 25$ , \*\*\*\* =  $p < 0.0001$ , \*\*\* =  $p < 0.0005$ . When many measurements of zero are  
764 clustered on the horizontal axis, the number of such data points is indicated. All measurements are  
765 given with 95% confidence intervals.

766

767

768

769

770

771



Figure 4 supplement 1

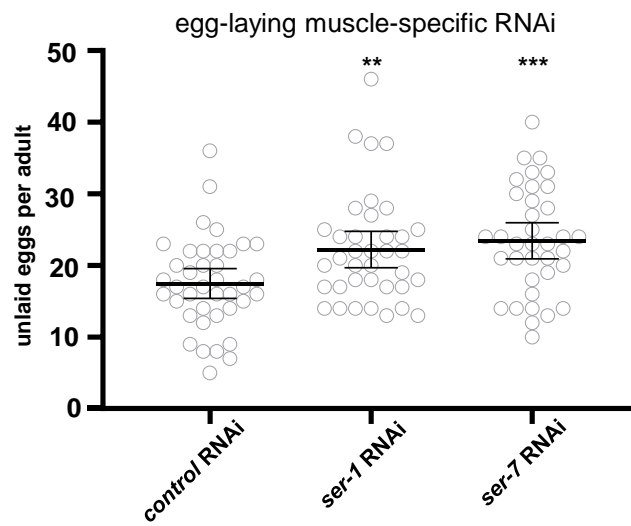

772 **Figure 4-figure supplement 1. Egg-laying muscle specific knockdown of *ser-1* or *ser-7* result**  
773 **in significantly increased accumulation of unlaidd eggs.** Egg-laying muscle specific RNAi was  
774 used to knock down serotonin receptors and the resulting accumulation of unlaidd eggs was  
775 measured. Anti-*gfp* RNAi was used as a negative control. Graph indicates the average number of  
776 unlaidd eggs per adult worm,  $n \geq 30$  for each genotype. \*\* =  $p < 0.01$ , \*\*\* =  $p < 0.001$ . All  
777 measurements are given with 95% confidence intervals.

778

779

780

Figure 5

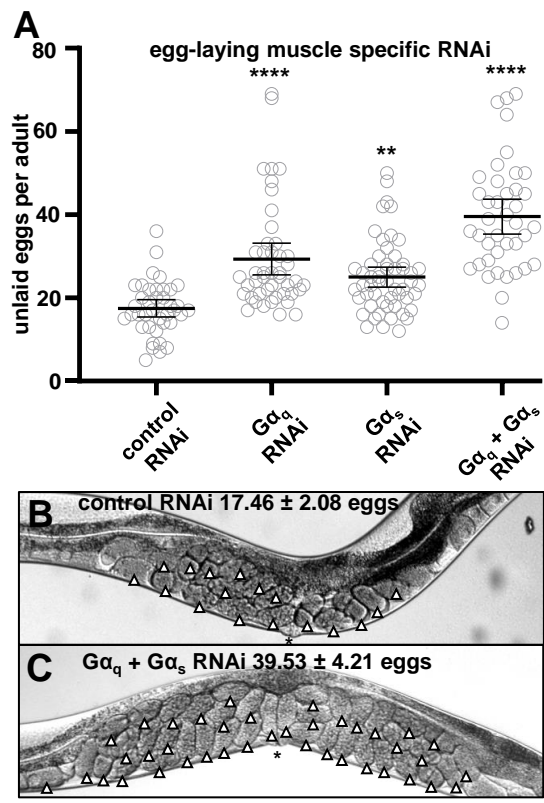

781 **Figure 5.  $G\alpha_q$  and  $G\alpha_s$  signaling are necessary in the egg-laying muscles to drive proper egg**  
782 **laying.** Egg-laying muscle specific RNAi was used to knock down  $G\alpha$  proteins and the resulting  
783 accumulation of unlaidd eggs was measured. Anti-*gfp* RNAi was used as a negative control. (A)  
784 Average number of unlaidd eggs per adult worm,  $n \geq 30$  for each genotype. \*\* indicates  $p < 0.01$ ,  
785 \*\*\*\* indicates  $p < 0.0001$ . (B, C) Photographs of worms of the indicated genotypes, with unlaidd  
786 eggs indicated by white arrowheads. The vulval slit is indicated by \*. All measurements are given  
787 with 95% confidence intervals.  
788  
789

Figure 5—figure supplement 1

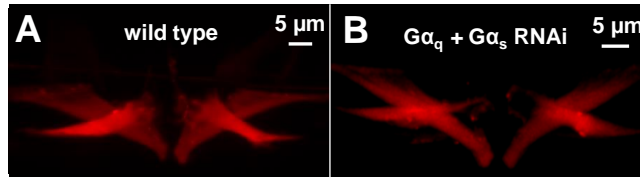

790 **Figure 5-figure supplement 1. Knock down of  $G\alpha_q$  and  $G\alpha_s$  in the egg-laying muscles does**  
791 **not disrupt development of the vm1 and vm2 vulval muscle cells.** Confocal images of  
792 mCherry-labelled vm1 and vm2 vulval muscles in (A) adult wild-type worms and (B) adult  
793 worms in which  $G\alpha_q$  and  $G\alpha_s$  were both knocked down in the egg-laying muscles. No significant  
794 differences are discernable in the morphology of the muscles in these two types of animals.  
795 Fifteen animals of each genotype were inspected and the vm1 and mv2 vulval muscles had fully  
796 developed in all of the inspected animals.  
797

Figure 6

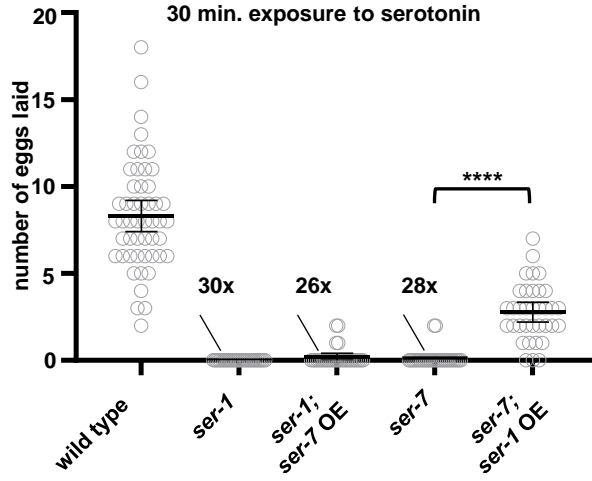

798 **Figure 6. Over-expression of SER-1 is sufficient to allow serotonin to induce egg laying in**  
799 **the absence of SER-7.** Number of eggs laid per worm during a 30-minute exposure to exogenous  
800 serotonin on NGM plates. “OE” indicates overexpression of the indicated receptor from a high-  
801 copy transgene that carries the entire receptor gene, including its promoter, so that the receptor is  
802 overexpressed in the same cells that normally express the endogenous receptor. For three  
803 genotypes, the number of animals that laid zero eggs are indicated since the many individual data  
804 points bunched on the horizontal axis are difficult to discern.  $n \geq 30$ , \*\*\*\* =  $p < 0.0001$ . All  
805 measurements are given with 95% confidence intervals.

806

807

808

809

810

811

812

813

814

815

816

817

818

819

820

821



Figure 6—figure supplement 1

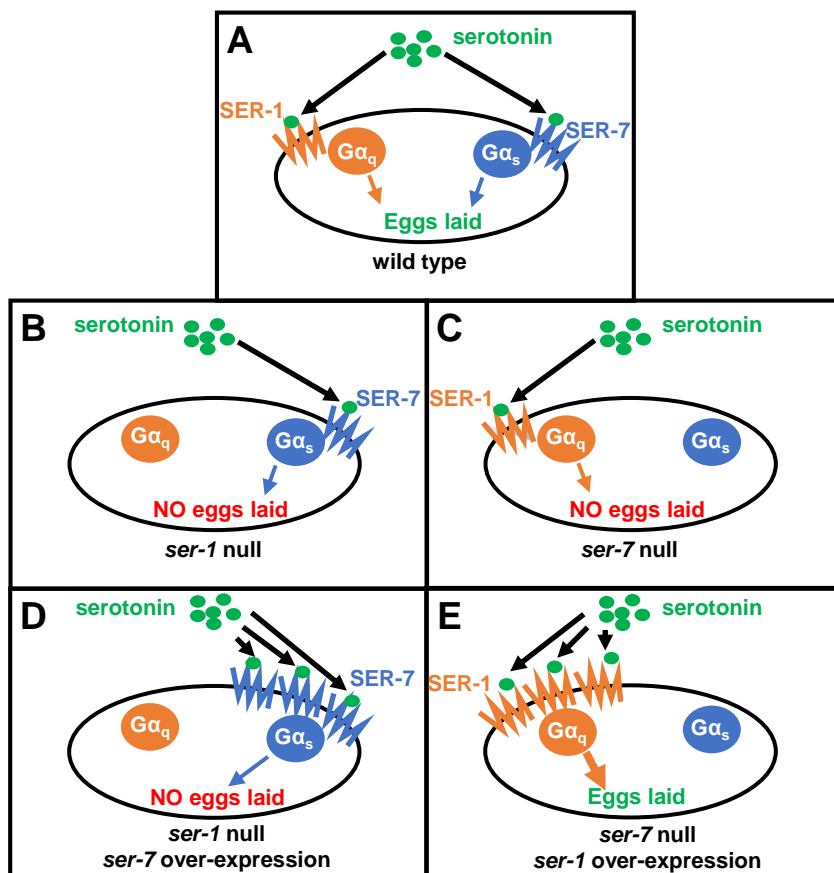

822 **Figure 6-figure supplement 1. Schematic of the design and results of an experiment**  
823 **overexpressing SER-1 or SER-7 in the absence of the other receptor. (A)** In wild-type animals,  
824 serotonin signals through endogenous levels of SER-1 and SER-7 receptors to activate low levels  
825 of  $G\alpha_q$  and  $G\alpha_s$  signaling, respectively, that combine to induce egg laying. **(B)** Signaling by  
826 endogenous SER-7/ $G\alpha_s$  is not sufficient to induce egg laying in the absence of SER-1. **(C)**  
827 Signaling by endogenous SER-1/ $G\alpha_q$  is not sufficient to induce egg laying in the absence of SER-  
828 7. **(D)** Overexpressed SER-7 receptor, which might be expected to increase  $G\alpha_s$  signaling, is also  
829 not sufficient to allow serotonin induce egg laying in the absence of SER-1. **(E)** Overexpressed  
830 SER-1 receptor, which might be expected to increase  $G\alpha_q$  signaling, is sufficient to allow serotonin  
831 to induce egg laying in the absence of SER-7.

832

833

834

835

836

837

838

839

840

841

842

843

Figure 7

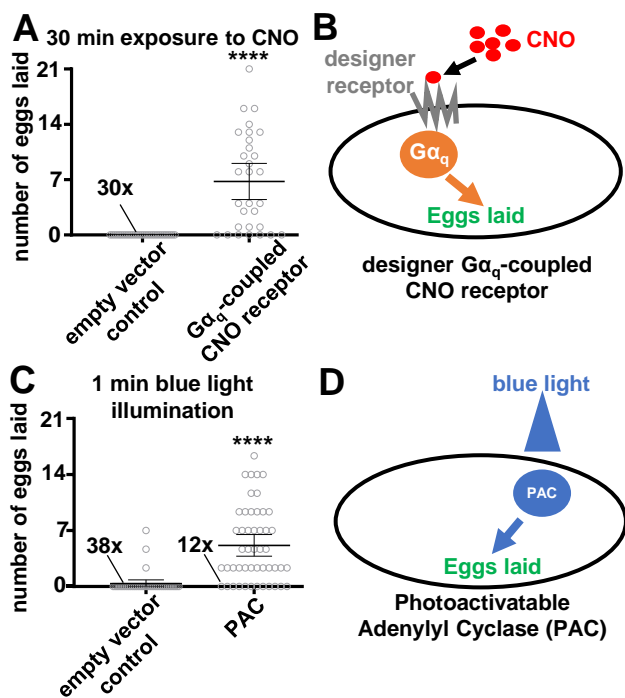

844 **Figure 7. Signals from either the  $G\alpha_q$  or  $G\alpha_s$  pathways in the egg-laying muscles can be**  
845 **sufficient to drive egg laying. (A)** Number of eggs laid per worm after 30 minutes of exposure to  
846 10 mM CNO in worms expressing either the designer  $G\alpha_q$ -coupled CNO-responsive receptor in  
847 their egg-laying muscles or carrying a control empty vector transgene. **(B)** Schematic of the design  
848 of the experiment shown in **(A)**. **(C)** Number of eggs laid per worm after 1 minute of exposure to  
849 blue light in animals expressing Photoactivatable Adenylyl Cyclase (PAC) in the egg-laying  
850 muscles to induce the downstream effects of  $G\alpha_s$  signaling. **(D)** Schematic of the design of the  
851 experiment shown in **(C)**. For both assays  $n \geq 30$ . \*\*\*\* =  $p < 0.0001$ . All measurements are given  
852 with 95% confidence intervals.  
853  
854

Figure 8

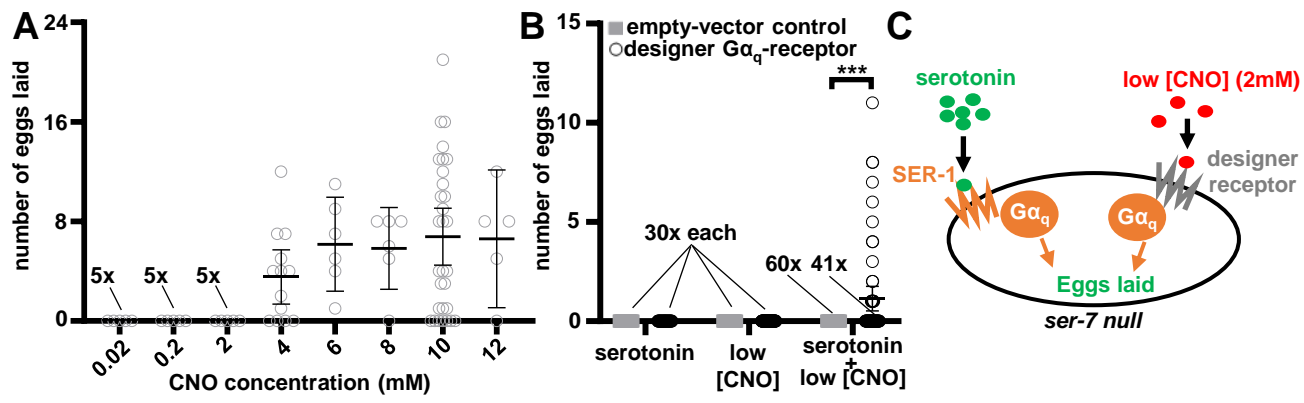

855 **Figure 8. The combination of subthreshold signals from two different  $G\alpha_q$ -coupled receptors**  
856 **in the egg-laying muscles is sufficient to drive egg laying.** (A) Number of eggs laid after 30  
857 minutes by worms expressing the designer  $G\alpha_q$ -coupled CNO receptor in their egg-laying muscles  
858 after being treated with a range of CNO concentrations.  $n \geq 5$ . (B) *ser-7* mutant animals, with or  
859 without expression of the CNO receptor in their egg-laying muscles, were exposed to either 25  
860 mM exogenous serotonin, 2 mM CNO, or both. Eggs laid after 30 minutes were counted.  $n \geq 30$ . In  
861 each condition, the number of animals that laid zero eggs is indicated above the data point. \*\*\* =  
862  $p < 0.001$ . (C) Schematic of the design and results of the experiment shown in (B). Note that the lack  
863 of the SER-7 receptor results in serotonin signaling only via SER-1/ $G\alpha_q$ . The threshold of signaling  
864 required to activate egg laying is reached by combining two subthreshold signals generated by: 1)  
865 partially activating the designer  $G\alpha_q$ -coupled receptor with a low concentration of 2mM CNO, and  
866 2) activating the  $G\alpha_q$ -coupled SER-1 receptor with exogenous serotonin. All measurements are  
867 given with 95% confidence intervals.

868

869

870

871

872

873

874

875

876

figure 9

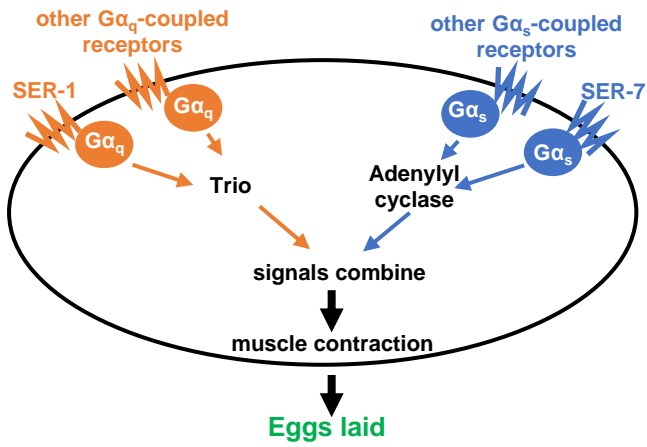

877 **Figure 9. Model for the regulation of egg-laying muscle activity by multiple  $G\alpha_q$ - and  $G\alpha_s$ -**  
878 **coupled GPCRs.** Each  $G\alpha$  protein is activated in parallel by a serotonin receptor and additional  
879 GPCRs.  $G\alpha_q$  directly activates the RhoGEF protein Trio, while  $G\alpha_s$  directly activates adenylyl  
880 cyclase. The two signaling pathways intersect at a downstream point, yet to be determined, to  
881 promote muscle contraction, which drives egg laying. Individual GPCRs provide signaling too  
882 weak to result in a significant increase in egg laying, but combining signaling by multiple GPCRs  
883 through  $G\alpha_q$ ,  $G\alpha_s$ , or both can result in a significant behavioral outcome.

884

885 **Video 1. Optogenetic activation of Photoactivatable Adenylyl Cyclase (PAC) in the *C. elegans***  
886 **egg-laying muscles is sufficient to induce egg laying.** The experiment begins with a transgenic  
887 worm, expressing PAC in its egg-laying muscles, crawling on a standard laboratory nematode  
888 growth medium plate backlit by dim white light. Three seconds into the video, blue light  
889 illuminates the worm. Five seconds after blue light illumination the worm lays its first egg. Six  
890 eggs are laid within 29 seconds of blue light illumination.

891

892 **Supplemental File 1.**

893 An excel file containing descriptions of the strains, transgenes, RNAi constructs, and plasmids  
894 used in this study.

895



896 **References**

897

898 Bany IA, Dong MQ, Koelle MR. 2003. Genetic and cellular basis for acetylcholine inhibition of

899 *Caenorhabditis elegans* egg-laying behavior. *J Neurosci.* **23**:8060-8069. doi:

900 10.1523/JNEUROSCI.23-22-08060.2003. PMID: 12954868.

901 Bargmann CI, Hartweg E, Horvitz HR. 1993. Odorant-selective genes and neurons mediate

902 olfaction in *C. elegans*. *Cell* **74**:515-527. doi: 10.1016/0092-8674(93)80053-h. PMID:

903 8348618.

904 Bonn M, Schmitt A, Lesch KP, Van Bockstaele EJ, Asan E. 2013. Serotonergic innervation and

905 serotonin receptor expression of NPY-producing neurons in the rat lateral and basolateral

906 amygdaloid nuclei. *Brain Struct Funct.* **218**:421-435. doi: 10.1007/s00429-012-0406-5.

907 PMID: 22527118. Brewer JC, Olson AC, Collins KM, Koelle MR. 2019. Serotonin and

908 neuropeptides are both released by the HSN command neuron to initiate *Caenorhabditis*

909 *elegans* egg laying. *PLoS Genet.* **15**:e1007896. doi: 10.1371/journal.pgen.1007896. PMID:

910 30677018.

911 Bristow MR, Ginsburg R, Umans V, Fowler M, Minobe W, Rasmussen R, Zera P, Menlove R,

912 Shah P, Jamieson S. 1986. Beta 1- and beta 2-adrenergic-receptor subpopulations in

913 nonfailing and failing human ventricular myocardium: coupling of both receptor subtypes to

914 muscle contraction and selective beta 1-receptor down-regulation in heart failure. *Circ Res.*

915 **59**:297-309. doi: 10.1161/01.res.59.3.297. PMID: 2876788.

916 Carnell L, Illi J, Hong SW, McIntire SL. 2005. The G-protein-coupled serotonin receptor SER-1

917 regulates egg laying and male mating behaviors in *Caenorhabditis elegans*. *J Neurosci.*

918 **25**:10671-10681. doi: 10.1523/JNEUROSCI.3399-05.2005. PMID: 16291940.

- 919 Carre-Pierrat M, Baillie D, Johnsen R, Hyde R, Hart A, Granger L, Ségalat L. 2006.  
920 Characterization of the *Caenorhabditis elegans* G protein-coupled serotonin receptors. *Invert*  
921 *Neurosci.* **6**:189-205. doi: 10.1007/s10158-006-0033-z. PMID: 17082916.
- 922 Chase DL, Koelle MR. 2004. Genetic analysis of RGS protein function in *Caenorhabditis*  
923 *elegans*. *Methods Enzymol.* **389**:305-320. doi: 10.1016/S0076-6879(04)89018-9. PMID:  
924 15313573.
- 925 Chikumi H, Vázquez-Prado J, Servitja JM, Miyazaki H, Gutkind JS. 2002. Potent activation of  
926 RhoA by Galpha q and Gq-coupled receptors. *J Biol Chem.* **277**:27130-27134. doi:  
927 10.1074/jbc.M204715200. PMID: 12016230.
- 928 Collins KM, Koelle MR. 2013. Postsynaptic ERG potassium channels limit muscle excitability  
929 to allow distinct egg-laying behavior states in *Caenorhabditis elegans*. *J Neurosci.* **33**:761-  
930 775. doi: 10.1523/JNEUROSCI.3896-12.2013. PMID: 23303953.
- 931 Collins KM, Bode A, Fernandez RW, Tanis JE, Brewer JC, Creamer MS, Koelle MR. 2016.  
932 Activity of the *C. elegans* egg-laying behavior circuit is controlled by competing activation  
933 and feedback inhibition. *Elife* **5**:e21126. doi: 10.7554/eLife.21126. PMID: 27849154.
- 934 Dempsey CM, Mackenzie SM, Gargus A, Blanco G, Sze JY. 2005. Serotonin (5HT), fluoxetine,  
935 imipramine and dopamine target distinct 5HT receptor signaling to modulate *Caenorhabditis*  
936 *elegans* egg-laying behavior. *Genetics* **169**:1425-1436. doi: 10.1534/genetics.104.032540.  
937 Epub 2005 Jan 16. PMID: 15654117.
- 938 Desai C, Horvitz HR. 1989. *Caenorhabditis elegans* mutants defective in the functioning of the  
939 motor neurons responsible for egg laying. *Genetics* **121**:703-721. doi:  
940 10.1093/genetics/121.4.703. PMID: 2721931.

- 941 Dhakal P, Chaudhry SI, Signorelli R, Collins KM. 2022. Serotonin signals through postsynaptic  
942  $G\alpha_q$ , Trio RhoGEF, and diacylglycerol to promote *Caenorhabditis elegans* egg-laying circuit  
943 activity and behavior. *Genetics* **221**:iyac084. doi: 10.1093/genetics/iyac084. PMID:  
944 35579369.
- 945 Esposito G, Di Schiavi E, Bergamasco C, Bazzicalupo P. 2007. Efficient and cell specific knock-  
946 down of gene function in targeted *C. elegans* neurons. *Gene* **395**:170-176. doi:  
947 10.1016/j.gene.2007.03.002. PMID: 17459615.
- 948 Feng J, Cai X, Zhao J, Yan Z. 2001. Serotonin receptors modulate GABA(A) receptor channels  
949 through activation of anchored protein kinase C in prefrontal cortical neurons. *J Neurosci.*  
950 **21**:6502-6511. doi: 10.1523/JNEUROSCI.21-17-06502.2001. PMID: 11517239.
- 951 Fernandez RW, Wei K, Wang EY, Mikalauskaite D, Olson A, Pepper J, Christie N, Kim S,  
952 Weissenborn S, Sarov M, Koelle MR. 2020. Cellular Expression and Functional Roles of All  
953 26 Neurotransmitter GPCRs in the *C. elegans* Egg-Laying Circuit. *J Neurosci.* **40**:7475-7488.  
954 doi: 10.1523/JNEUROSCI.1357-20.2020. PMID: 32847964.
- 955 Hanlon CD, Andrew DJ. 2015. Outside-in signaling--a brief review of GPCR signaling with a  
956 focus on the *Drosophila* GPCR family. *J Cell Sci.* **128**:3533-35342. doi: 10.1242/jcs.175158.  
957 PMID: 26345366.
- 958 Hamdan FF, Ungrin MD, Abramovitz M, Ribeiro P. 1999. Characterization of a novel serotonin  
959 receptor from *Caenorhabditis elegans*: cloning and expression of two splice variants. *J*  
960 *Neurochem.* **72**:1372-1383. doi: 10.1046/j.1471-4159.1999.721372.x. PMID: 10098838.
- 961 Hapiak VM, Hobson RJ, Hughes L, Smith K, Harris G, Condon C, Komuniecki P, Komuniecki  
962 RW. 2009. Dual excitatory and inhibitory serotonergic inputs modulate egg laying in

- 963 *Caenorhabditis elegans*. *Genetics* **181**:153-163. doi: 10.1534/genetics.108.096891. PMID:  
964 19001289.
- 965 Harris G, Mills H, Wragg R, Hapiak V, Castelletto M, Korchnak A, Komuniecki RW. 2010. The  
966 monoaminergic modulation of sensory-mediated aversive responses in *Caenorhabditis*  
967 *elegans* requires glutamatergic/peptidergic cotransmission. *J Neurosci.* **30**:7889-7899. doi:  
968 10.1523/JNEUROSCI.0497-10.2010. PMID: 20534837.
- 969 Henss T, Schneider M, Vettkötter D, Costa WS, Liewald JF, Gottschalk A. 2022. Photoactivated  
970 Adenylyl Cyclases as Optogenetic Modulators of Neuronal Activity. *Methods Mol Biol.*  
971 **2483**:61-76. doi: 10.1007/978-1-0716-2245-2\_4. PMID: 35286669.
- 972 Hobson RJ, Geng J, Gray AD, Komuniecki RW. 2003. SER-7b, a constitutively active Galphas  
973 coupled 5-HT7-like receptor expressed in the *Caenorhabditis elegans* M4 pharyngeal  
974 motorneuron. *J Neurochem.* **87**:22-29. doi: 10.1046/j.1471-4159.2003.01967.x. PMID:  
975 12969249.
- 976 Hobson RJ, Hapiak VM, Xiao H, Buehrer KL, Komuniecki PR, Komuniecki RW. 2006. SER-7,  
977 a *Caenorhabditis elegans* 5-HT7-like receptor, is essential for the 5-HT stimulation of  
978 pharyngeal pumping and egg laying. *Genetics* **172**:159-169. doi:  
979 10.1534/genetics.105.044495. PMID: 16204223.
- 980 Jiang H, Galtes D, Wang J, Rockman HA. 2022. G Protein-Coupled Receptor Signaling:  
981 Transducers and Effectors. *Am J Physiol Cell Physiol.* doi: 10.1152/ajpcell.00210.2022.  
982 PMID: 35816644.
- 983 Kaur H, Carvalho J, Looso M, Singh P, Chennupati R, Preussner J, Günther S, Albarrán-Juárez  
984 J, Tischner D, Classen S, Offermanns S, Wettschureck N. 2017. Single-cell profiling reveals

- 985 heterogeneity and functional patterning of GPCR expression in the vascular system. *Nat*  
986 *Commun.* **8**:15700. doi: 10.1038/ncomms15700. **10**:1448. PMID: 28621310.
- 987 Kopchok RJ 3rd, Ravi B, Bode A, Collins KM. 2021. The Sex-Specific VC Neurons Are  
988 Mechanically Activated Motor Neurons That Facilitate Serotonin-Induced Egg Laying in *C.*  
989 *elegans*. *J Neurosci.* **41**:3635-3650. doi: 10.1523/JNEUROSCI.2150-20.2021. PMID:  
990 33687965.
- 991 Lee HM, Giguere PM, Roth BL. 2014. DREADDs: novel tools for drug discovery and  
992 development. *Drug Discov Today.* **19**:469-473. doi:10.1016/j.drudis.2013.10.018.
- 993 Lin F, Owens WA, Chen S, Stevens ME, Kesteven S, Arthur JF, Woodcock EA, Feneley MP,  
994 Graham RM. 2001. Targeted alpha(1A)-adrenergic receptor overexpression induces enhanced  
995 cardiac contractility but not hypertrophy. *Circ Res.* **89**:343-350. doi: 10.1161/hh1601.095912.  
996 PMID: 11509451.
- 997 Lopez ER, Carbajal AG, Tian JB, Bavencoffe A, Zhu MX, Dessauer CW, Walters ET. 2021.  
998 Serotonin enhances depolarizing spontaneous fluctuations, excitability, and ongoing activity  
999 in isolated rat DRG neurons via 5-HT<sub>4</sub> receptors and cAMP-dependent mechanisms.  
1000 *Neuropharmacology.* **184**:108408. doi: 10.1016/j.neuropharm.2020.108408. PMID:  
1001 33220305.
- 1002 Lutz S, Freichel-Blomquist A, Yang Y, Rumenapp U, Jakobs KH, Schmidt M, Wieland T. 2005.  
1003 The guanine nucleotide exchange factor p63RhoGEF, a specific link between Gq/11-coupled  
1004 receptor signaling and RhoA. *J Biol Chem.* **280**:11134-11139. doi: 10.1074/jbc.M411322200.  
1005 PMID: 15632174.
- 1006 Lutz S, Shankaranarayanan A, Coco C, Ridilla M, Nance MR, Vettel C, Baltus D, Evelyn CR,  
1007 Neubig RR, Wieland T, Tesmer JJ. 2007. Structure of Galphaq-p63RhoGEF-RhoA complex

- 1008 reveals a pathway for the activation of RhoA by GPCRs. *Science* **318**:1923-7. doi:  
1009 10.1126/science.1147554. PMID: 18096806.
- 1010 Lymperopoulos A, Cora N, Maning J, Brill AR, Sizova A. 2021. Signaling and function of  
1011 cardiac autonomic nervous system receptors: Insights from the GPCR signalling universe.  
1012 *FEBS J.* **288**:2645-2659. doi: 10.1111/febs.15771. PMID: 33599081.
- 1013 Marder E, Bucher D. 2007. Understanding circuit dynamics using the stomatogastric nervous  
1014 system of lobsters and crabs. *Annu Rev Physiol.* **69**:291-316. doi:  
1015 10.1146/annurev.physiol.69.031905.161516. PMID: 17009928.
- 1016 McCloskey DT, Turnbull L, Swigart P, O'Connell TD, Simpson PC, Baker AJ. 2003. Abnormal  
1017 myocardial contraction in alpha(1A)- and alpha(1B)-adrenoceptor double-knockout mice. *J*  
1018 *Mol Cell Cardiol.* **35**:1207-1216. doi: 10.1016/s0022-2828(03)00227-x. PMID: 14519431.
- 1019 Meggs LG, Coupet J, Huang H, Cheng W, Li P, Capasso JM, Homcy CJ, Anversa P. 1993.  
1020 Regulation of angiotensin II receptors on ventricular myocytes after myocardial infarction in  
1021 rats. *Circ Res.* **72**:1149-1162. doi: 10.1161/01.res.72.6.1149. PMID: 8495545.
- 1022 Miller KG, Alfonso A, Nguyen M, Crowell JA, Johnson CD, Rand JB. 1996. A genetic selection  
1023 for *Caenorhabditis elegans* synaptic transmission mutants. *Proc Natl Acad Sci U S A.*  
1024 **93**:12593-12598. doi: 10.1073/pnas.93.22.12593. PMID: 8901627.
- 1025 O'Connell TD, Ishizaka S, Nakamura A, Swigart PM, Rodrigo MC, Simpson GL, Cotecchia S,  
1026 Rokosh DG, Grossman W, Foster E, Simpson PC. 2003. The alpha(1A/C)- and alpha(1B)-  
1027 adrenergic receptors are required for physiological cardiac hypertrophy in the double-  
1028 knockout mouse. *J Clin Invest.* **111**:1783-1791. doi: 10.1172/JCI16100. PMID: 12782680.

- 1029 Prömel S, Fiedler F, Binder C, Winkler J, Schöneberg T, Thor D. 2016. Deciphering and  
1030 modulating G protein signalling in *C. elegans* using the DREADD technology. *Sci Rep.*  
1031 **6**:28901. doi: 10.1038/srep28901. PMID: 27461895.
- 1032 Rasmussen K, Aghajanian GK. 1990. Serotonin excitation of facial motoneurons: receptor  
1033 subtype characterization. *Synapse.* **5**:324-332. doi: 10.1002/syn.890050409. PMID: 2360199.
- 1034 Ravi B, Nassar LM, Kopchock RJ 3rd, Dhakal P, Scheetz M, Collins KM. 2018b. Ratiometric  
1035 Calcium Imaging of Individual Neurons in Behaving *Caenorhabditis Elegans*. *J Vis Exp.*  
1036 **(132)**:56911. doi: 10.3791/56911. PMID: 29443112.
- 1037 Reynolds NK, Schade MA, Miller KG. 2005. Convergent, RIC-8-dependent Galpha signaling  
1038 pathways in the *Caenorhabditis elegans* synaptic signaling network. *Genetics* **169**:651-670.  
1039 doi: 10.1534/genetics.104.031286. PMID: 15489511.
- 1040 Ringstad N, Horvitz HR. 2008. FMRFamide neuropeptides and acetylcholine synergistically  
1041 inhibit egg-laying by *C. elegans*. *Nat Neurosci.* **11**:1168-1176. doi: 10.1038/nn.2186. PMID:  
1042 18806786.
- 1043 Rojas RJ, Yohe ME, Gershburg S, Kawano T, Kozasa T, Sondek J. 2007. Galphaq directly  
1044 activates p63RhoGEF and Trio via a conserved extension of the Dbl homology-associated  
1045 pleckstrin homology domain. *J Biol Chem.* **282**:29201-29210. doi: 10.1074/jbc.M703458200.  
1046 PMID: 17606614.
- 1047 Salazar NC, Chen J, Rockman HA. 2007. Cardiac GPCRs: GPCR signaling in healthy and  
1048 failing hearts. *Biochim Biophys Acta.* **1768**:1006-1018. doi: 10.1016/j.bbamem.2007.02.010.  
1049 PMID: 17376402.

- 1050 Sarkar P, Mozumder S, Bej A, Mukherjee S, Sengupta J, Chattopadhyay A. 2020. Structure,  
1051 dynamics and lipid interactions of serotonin receptors: excitements and challenges. *Biophys*  
1052 *Rev.* **13**:101–122. doi: 10.1007/s12551-020-00772-8. PMID: 33188638.
- 1053 Smith SJ, Sümbül U, Graybuck LT, Collman F, Seshamani S, Gala R, Gliko O, Elabbady L,  
1054 Miller JA, Bakken TE, Rossier J, Yao Z, Lein E, Zeng H, Tasic B, Hawrylycz M. 2019.  
1055 Single-cell transcriptomic evidence for dense intracortical neuropeptide networks. *Elife*  
1056 **8**:e47889. doi: 10.7554/eLife.47889. PMID: 31710287.
- 1057 Smrcka AV, Hepler JR, Brown KO, Sternweis PC. 1991. Regulation of polyphosphoinositide-  
1058 specific phospholipase C activity by purified Gq. *Science* **251**:804-807. doi:  
1059 10.1126/science.1846707. PMID: 1846707.
- 1060 Steuer Costa W, Yu SC, Liewald JF, Gottschalk A. 2017. Fast cAMP Modulation of  
1061 Neurotransmission via Neuropeptide Signals and Vesicle Loading. *Curr Biol.* **27**:495-507. doi:  
1062 10.1016/j.cub.2016.12.055. PMID: 28162892.
- 1063 Sze JY, Victor M, Loer C, Shi Y, Ruvkun G. 2000. Food and metabolic signalling defects in a  
1064 *Caenorhabditis elegans* serotonin-synthesis mutant. *Nature* **403**:560-564. doi:  
1065 10.1038/35000609. PMID: 10676966.
- 1066 Taylor SJ, Chae HZ, Rhee SG, Exton JH. 1991. Activation of the beta 1 isozyme of phospholipase  
1067 C by alpha subunits of the Gq class of G proteins. *Nature* **350**:516-518. doi: 10.1038/350516a0.  
1068 PMID: 1707501.
- 1069 Taylor CW. 2017. Regulation of IP<sub>3</sub> receptors by cyclic AMP. *Cell Calcium* **63**:48-52. doi:  
1070 10.1016/j.ceca.2016.10.005. PMID: 27836216.



- 1071 Trent C, Tsuing N, Horvitz HR. 1983. Egg-laying defective mutants of the nematode  
1072 *Caenorhabditis elegans*. *Genetics* **104**:619-647. doi: 10.1093/genetics/104.4.619. PMID:  
1073 11813735.
- 1074 Wang J, Gareri C, Rockman HA. 2018. G-Protein-Coupled Receptors in Heart Disease. *Circ*  
1075 *Res.* **123**:716-735. doi: 10.1161/CIRCRESAHA.118.311403. 123:e34. PMID: 30355236.
- 1076 Waggoner LE, Zhou GT, Schafer RW, Schafer WR. 1998. Control of alternative behavioral states  
1077 by serotonin in *Caenorhabditis elegans*. *Neuron* **21**:203-214. doi: 10.1016/s0896-  
1078 6273(00)80527-9. PMID: 9697864.
- 1079 Williams SL, Lutz S, Charlie NK, Vettel C, Ailion M, Coco C, Tesmer JJ, Jorgensen EM, Wieland  
1080 T, Miller KG. 2007. Trio's Rho-specific GEF domain is the missing Galpha q effector in *C.*  
1081 *elegans*. *Genes Dev.* **21**:2731-246. doi: 10.1101/gad.1592007. PMID: 17942708.
- 1082 Winston WM, Molodowitch C, Hunter CP. 2002. Systemic RNAi in *C. elegans* requires the  
1083 putative transmembrane protein SID-1. *Science* **295**:2456-2459. doi: 10.1126/science.1068836.  
1084 PMID: 11834782.
- 1085 Xu H, Shi X, Li X, Zou J, Zhou C, Liu W, Shao H, Chen H, Shi L. 2020. Neurotransmitter and  
1086 neuropeptide regulation of mast cell function: a systematic review. *J Neuroinflammation.*  
1087 **17**:356. doi: 10.1186/s12974-020-02029-3. PMID: 33239034.
- 1088 Xu YJ, Gopalakrishnan V. 1991. Vasopressin increases cytosolic free [Ca<sup>2+</sup>] in the neonatal rat  
1089 cardiomyocyte. Evidence for V1 subtype receptors. *Circ Res.* **69**:239-245. doi:  
1090 10.1161/01.res.69.1.239. PMID: 2054937.
